# Supplementary material for: Hair follicle stem cells regulate retinoid metabolism to maintain the self-renewal niche for melanocyte stem cells
Source: eLife journal article supplement (doi:10.7554/elife.52712), 2020-01-03
Supplement: supp [file elife-52712-supp-v1.zip]

Archive with 10 entries (10 files):
- elife_poa_e52712_Figure_3_figure_supplement_1.jpg
- elife_poa_e52712_Figure_2_figure_supplement_1.jpg
- elife_poa_e52712_Figure_3_figure_supplement_2.jpg
- elife_poa_e52712_Figure_1_figure_supplement_1.jpg
- elife_poa_e52712_Figure_7_figure_supplement_1.jpg
- elife_poa_e52712_Supplementary_file_2.xlsx
- elife_poa_e52712_Figure_5_figure_supplement_1.jpg
- elife_poa_e52712_Transparent_Reporting_File.pdf
- elife_poa_e52712_Figure_6_figure_supplement_1.jpg
- elife_poa_e52712_Supplementary_file_1.xlsx
