# Supplementary material for: Hair follicle stem cells regulate retinoid metabolism to maintain the self-renewal niche for melanocyte stem cells
Source: eLife journal article supplement (doi:10.7554/elife.52712), 2020-01-03
Supplement: supp [file elife-52712-supp-v1.zip › elife_poa_e52712_Supplementary_file_1.xlsx]

## Sheet: Table 1
Table S1. Genes Up-regulated in RBP-J cKO versus WT dorsal HFSCs Related to Figure 3.
gene_id	FPKM in RNA-seq		log2(fold change of cKO versus WT)	p_value	q_value
	WT	cKO
H2-D1	120.139	196.837	0.712301	0.04955	0.9975
Lypd3	114.496	188.698	0.720784	0.0483	0.980911
Pla2g2f	110.733	185.127	0.741433	0.042	0.900574
Tsc22d1	53.1713	89.6141	0.753078	0.0458	0.948351
Nuak1	18.7636	31.7941	0.760826	0.04305	0.913785
Adamtsl4	36.3823	62.1439	0.772375	0.03435	0.808837
Celsr2	33.3186	57.5937	0.789585	0.0307	0.760958
Gltp	70.6108	122.42	0.793875	0.03165	0.767424
Jund	189.454	330.236	0.801653	0.0336	0.796931
Nr4a1	103.851	181.434	0.804925	0.02645	0.699591
Cpe	30.0074	52.6795	0.811926	0.04035	0.87945
Slc27a4	15.2922	26.883	0.813899	0.0378	0.859061
Tob2	25.6704	45.5084	0.826026	0.0287	0.734101
Slc27a3	37.8976	67.5022	0.83283	0.02985	0.751724
Magt1	14.9284	26.6189	0.834388	0.0316	0.767424
Dhcr24	39.965	71.5864	0.840948	0.0216	0.64185
Lrp4	8.55619	15.3702	0.845093	0.02865	0.734101
Socs3	88.7053	160.619	0.856555	0.0197	0.6061
Btg2	55.0563	101.088	0.876626	0.0179	0.573724
Acsl1	9.88189	18.2225	0.882865	0.04125	0.892382
Lgmn	21.8163	40.286	0.884873	0.0386	0.860391
Fos	930.631	1760.3	0.919541	0.0453	0.943062
Notch3	10.7387	20.3256	0.920479	0.01605	0.536852
Ier3	31.3965	60.5691	0.947978	0.03225	0.777636
Bcar1	24.6806	47.6907	0.950328	0.0121	0.45752
Auh	28.1387	54.4834	0.953258	0.0298	0.751724
Sema4g	13.8444	26.9748	0.962308	0.01435	0.501865
Ifitm3	71.9211	140.441	0.965478	0.02685	0.704745
Egr2	20.5085	40.1465	0.969049	0.0147	0.504636
Klf11	9.22781	18.0747	0.969908	0.0248	0.680727
Rab11fip4	11.0132	21.5963	0.971553	0.02375	0.666277
Trib1	22.7109	44.5938	0.973462	0.0106	0.426781
Spink5	14.0292	27.5476	0.973492	0.0127	0.465369
Adrb2	16.5772	32.6497	0.977872	0.0257	0.688412
Dapk1	3.39535	6.74115	0.989433	0.04225	0.900574
Acsbg1	14.0205	27.881	0.991747	0.0203	0.615845
Pxmp4	16.6733	33.2273	0.994833	0.0352	0.824079
Pim3	22.6886	45.3088	0.997822	0.01445	0.504011
Sertad1	23.9172	47.7747	0.998195	0.0313	0.767424
Tap2	17.1469	34.3526	1.00247	0.01705	0.551904
Nckap5l	8.22578	16.624	1.01504	0.0149	0.508823
Atf3	188.855	383.008	1.0201	0.00585	0.334347
Adh7	12.202	24.875	1.02758	0.0271	0.708344
Atp6v0c	100.016	204.419	1.03129	0.02085	0.629602
Txnip	100.329	205.614	1.0352	0.00355	0.250323
Tacstd2	47.2054	97.7592	1.05028	0.00635	0.340888
Ppp1r3c	12.2447	25.3885	1.05201	0.0187	0.589231
Egr1	452.818	940.308	1.0542	0.01645	0.539171
Acox3	5.8344	12.197	1.06387	0.0265	0.699591
Ankrd35	17.6231	36.8457	1.06402	0.00725	0.360714
Mt2	51.8006	108.321	1.06427	0.03325	0.791508
Bcl6	18.6553	39.1892	1.07088	0.00805	0.377742
Klf9	12.8909	27.1186	1.07293	0.00945	0.406849
Klf6	25.9723	55.1619	1.0867	0.0031	0.235113
Apcdd1	8.36172	17.7711	1.08766	0.02115	0.634257
Hrnr	1.4822	3.1532	1.08907	0.0354	0.826106
Ddit4	25.9791	55.2749	1.08927	0.01235	0.460302
Cish	10.5492	22.4502	1.0896	0.0251	0.680727
Nbeal2	1.93755	4.13455	1.09349	0.02935	0.744885
Klk5	18.4131	39.5413	1.10263	0.0245	0.677124
Pvrl4	19.0547	40.9422	1.10344	0.00335	0.241441
Tyro3	9.33369	20.0689	1.10444	0.0096	0.411947
Gpr115	3.99347	8.64139	1.11362	0.0431	0.913785
Fam25c	420.428	918.307	1.12712	0.0043	0.280468
Rab11fip1	2.05888	4.50064	1.12827	0.0308	0.760958
Asprv1	45.4566	99.5504	1.13094	0.0041	0.275693
Il1f5	6.94901	15.2659	1.13543	0.0449	0.940161
Fras1	2.06807	4.54427	1.13577	0.00845	0.38142
Ppp1r15a	33.0163	72.6166	1.13712	0.0047	0.296191
10042D19	7.99539	17.6205	1.14002	0.0104	0.426001
Mknk2	34.7378	76.6008	1.14085	0.0024	0.203828
Icam1	9.25101	20.4143	1.14189	0.01725	0.55562
Serpina12	2.80571	6.20891	1.14598	0.04205	0.900574
Cgn	4.56928	10.1707	1.15438	0.0164	0.538887
Sik1	10.8864	24.2375	1.15472	0.0055	0.326125
Junb	317.282	708.84	1.15969	0.00365	0.254622
Lipm	5.42137	12.1146	1.16001	0.0366	0.840576
Itih5	2.0916	4.69581	1.16677	0.02555	0.685802
Dsc1	8.76998	19.6942	1.16713	0.009	0.399337
Ier2	99.3952	224.706	1.17679	0.0021	0.192919
Susd2	40.075	90.9039	1.18164	0.0013	0.151415
Kctd12	5.42287	12.3019	1.18175	0.00605	0.334347
Cdkn1a	21.8861	49.7278	1.18404	0.00465	0.294462
Eps8l1	7.30643	16.7129	1.19372	0.0255	0.685802
Slc15a2	2.7448	6.33306	1.2062	0.0308	0.760958
Rhob	46.2328	107.41	1.21614	0.00135	0.153137
Ceacam19	3.25902	7.60704	1.2229	0.0345	0.810905
Plekhn1	36.0563	84.8275	1.23428	0.00115	0.140203
Me1	6.62417	15.6789	1.24302	0.009	0.399337
Sdr9c7	2.33835	5.5616	1.25001	0.04745	0.967164
Dgat2	19.7476	47.0153	1.25145	0.0022	0.196568
Jun	373.689	890.952	1.25351	0.0053	0.320086
Klk8	12.0877	29.1376	1.26934	0.0191	0.597505
Krt16	4.96148	11.9597	1.26934	0.047	0.959491
Elovl6	14.9271	36.0284	1.2712	0.00105	0.135616
Alox12	2.36455	5.71269	1.27261	0.0451	0.942371
Ctgf	128.119	310.668	1.27788	0.00085	0.127451
10050C09	20.0967	48.741	1.27817	0.0124	0.460849
Gm6548	5.91312	14.3539	1.27945	0.02445	0.677124
Skint3	5.4564	13.2837	1.28363	0.0203	0.615845
Cst6	5.97743	14.6383	1.29215	0.00715	0.358737
Nfkbiz	15.8479	39.0216	1.29999	0.00095	0.13045
Klk11	6.3163	15.5612	1.3008	0.0445	0.933284
Nfkbia	82.5977	203.967	1.30416	0.00745	0.363708
Abca12	3.11255	7.70751	1.30817	0.00535	0.320141
Klk7	39.2588	97.5003	1.31239	0.0013	0.151415
Zfp36	271.509	679.953	1.32444	0.00045	0.0876157
Bpifc	8.35712	20.9411	1.32526	0.008	0.376751
Angel1	7.269	18.2917	1.33136	0.0041	0.275693
Smoc2	7.54279	19.0152	1.33398	0.00555	0.327601
Paqr7	9.01315	22.7865	1.33808	0.00875	0.390903
Krt79	87.2261	222.498	1.35096	0.00045	0.0876157
Fosb	193.751	495.502	1.35469	0.00135	0.153137
Cpm	1.43116	3.69532	1.36851	0.034	0.802043
Irf1	2.88468	7.46992	1.37268	0.03605	0.833816
Wnk2	1.28817	3.34098	1.37495	0.02295	0.659433
10042E22	4.60212	11.9422	1.3757	0.04045	0.87945
Il1rn	2.25386	5.89864	1.38798	0.03835	0.860391
Scnn1a	2.18478	5.73523	1.39237	0.0286	0.734101
Lypd5	8.91358	23.4608	1.39617	0.02725	0.709533
Cyp2b19	3.01235	7.94103	1.39843	0.03145	0.767424
Atp2c2	2.60232	6.86048	1.39851	0.0217	0.641897
Orm1	13.2902	35.0767	1.40016	0.0289	0.73777
Nccrp1	9.37448	24.8252	1.405	0.01275	0.465893
Npl	5.33763	14.1797	1.40955	0.0271	0.708344
Crabp2	12.2177	32.7574	1.42284	0.02135	0.637324
H2-K1	72.9404	195.687	1.42376	0.00015	0.0489188
Mt1	234.69	634.671	1.43525	0.0004	0.0876157
30417I10R	0.578489	1.566	1.43672	0.0454	0.943062
Acacb	1.92638	5.23051	1.44106	0.00625	0.336906
Gadl1	2.86606	7.81084	1.44641	0.01305	0.470269
Slc24a3	2.17344	5.97355	1.45861	0.0129	0.468748
Calm4	77.5511	214.397	1.46707	0.00065	0.103405
Slc37a2	0.766473	2.1237	1.47027	0.0421	0.900574
Oas1f	7.08395	19.7223	1.4772	0.01865	0.589078
30548M08	1.52449	4.25939	1.48232	0.01705	0.551904
Dusp1	184.793	516.377	1.48252	5e-05	0.0224914
Lce1a2	6.19149	17.3645	1.48778	0.04535	0.943062
Aloxe3	2.12908	5.97344	1.48833	0.028	0.721858
Gprin2	3.48866	9.79438	1.48928	0.02775	0.718251
Wfdc3	11.0025	30.9269	1.49103	0.0198	0.606317
Krt10	863.345	2427.09	1.49122	0.0065	0.344685
Hs3st6	5.50258	15.4938	1.49351	0.0291	0.73998
Slc46a2	1.58531	4.51512	1.50999	0.04225	0.900574
Krt77	567.96	1623.4	1.51516	0.0009	0.13045
Skint7	2.16501	6.19521	1.51678	0.03555	0.827499
Fabp5	30.4001	87.2181	1.52055	0.0014	0.156094
Smagp	5.04678	14.4981	1.52243	0.0381	0.859887
Hal	20.3074	58.4206	1.52447	0.0003	0.0724722
Soat1	1.9575	5.67295	1.53509	0.01305	0.470269
Nipal4	2.7056	7.85879	1.53836	0.01455	0.504636
Dkkl1	7.57581	22.0079	1.53855	0.0242	0.673066
Tesc	6.20758	18.1398	1.54706	0.0365	0.839757
Ephx3	2.36136	6.90147	1.54729	0.02495	0.680727
Csrnp1	17.5904	51.4429	1.54818	0.00025	0.0665561
Metrnl	2.21743	6.52359	1.55678	0.02095	0.631161
Alox12e	28.2134	83.2652	1.56133	0.00015	0.0489188
Pdzk1ip1	42.3463	124.984	1.56143	0.00045	0.0876157
Tnfrsf19	1.86244	5.51016	1.5649	0.00845	0.38142
Lce1m	43.892	130.519	1.57223	0.0007	0.110018
Hpgds	1.06481	3.16895	1.57341	0.03335	0.792442
Pak6	1.81159	5.39938	1.57553	0.0152	0.516365
Niacr1	2.94003	8.76291	1.57558	0.02135	0.637324
Flg2	18.6045	55.6146	1.57981	5e-05	0.0224914
Cpxm2	1.19718	3.58625	1.58284	0.03155	0.767424
Errfi1	10.5923	31.7737	1.58482	0.0002	0.0606744
Adh1	2.24792	6.79146	1.59513	0.0498	0.998383
Sdr16c5	7.43563	22.5512	1.60067	0.0102	0.42241
Aif1l	1.25396	3.80774	1.60244	0.0321	0.775453
Crct1	10.5438	32.3223	1.61613	0.0167	0.544629
Cldn4	5.14739	15.7868	1.61681	0.00935	0.405218
Lor	254.46	782.205	1.62011	5e-05	0.0224914
Aldh3a1	8.61339	26.4958	1.62111	0.00445	0.288807
Scd1	29.5794	91.0072	1.62139	5e-05	0.0224914
Ptgs1	6.4418	19.8217	1.62154	0.0018	0.173933
Tgm1	4.4951	13.9493	1.63376	0.0021	0.192919
Agpat4	4.5208	14.0604	1.63699	0.00675	0.34942
Kprp	4.97965	15.4933	1.63753	0.00355	0.250323
Tmprss4	8.99808	28.0274	1.63915	0.001	0.134485
Krt78	8.31623	26.0392	1.64668	0.00115	0.140203
Arc	1.72315	5.40776	1.64998	0.0151	0.514307
Arl4d	2.97528	9.3723	1.65538	0.0252	0.682021
Nlrc5	0.818965	2.61292	1.67379	0.0146	0.504636
Ly6d	32.1817	102.872	1.67654	0.0021	0.192919
Gsdma	3.01547	9.65661	1.67913	0.0061	0.334347
Gdpd2	5.91661	18.9673	1.68068	0.0023	0.201366
Arhgdib	3.68902	11.8423	1.68264	0.0237	0.666277
Tprg	2.71617	8.72995	1.6844	0.0377	0.859061
00001G20	15.6344	50.255	1.68455	0.02325	0.663643
30079G13	0.980621	3.1545	1.68565	0.04145	0.894822
Acer1	6.90585	22.2428	1.68745	0.00185	0.176155
Dhrs7	9.69971	31.3731	1.69351	0.0041	0.275693
Cited4	2.21779	7.1783	1.69452	0.0459	0.948915
Psapl1	23.5029	76.4621	1.70191	0.0003	0.0724722
Hephl1	0.751312	2.4604	1.71141	0.02115	0.634257
Cebpd	9.34947	30.6431	1.7126	0.00485	0.298435
Fut2	2.81897	9.27363	1.71796	0.01005	0.418857
Trim72	0.715478	2.35698	1.71996	0.04565	0.946748
Sp6	2.0139	6.63542	1.7202	0.00745	0.363708
Faah	3.45129	11.4505	1.7302	0.0024	0.203828
Sphk1	4.17199	13.8516	1.73124	0.0083	0.380859
Arhgap40	1.16817	3.89929	1.73896	0.0386	0.860391
Grhl3	1.94918	6.54752	1.74808	0.01075	0.427542
Il12rb2	0.776203	2.611	1.7501	0.0381	0.859887
Pfkfb3	3.97118	13.3586	1.75013	0.0004	0.0876157
Rbp2	4.03744	13.6377	1.75608	0.0384	0.860391
Tnxb	0.638062	2.16255	1.76097	0.01185	0.451998
Krt25	3.05204	10.37	1.76457	0.01915	0.597636
Rnasel	0.300374	1.02767	1.77455	0.03805	0.859887
Pla2g4f	3.17564	10.8816	1.77678	0.0032	0.238537
Cdsn	12.5217	42.9184	1.77716	5e-05	0.0224914
Cyp4f39	3.5917	12.3264	1.77901	0.00565	0.330473
Rnaset2b	1.88666	6.56119	1.79812	0.0376	0.859005
Tchh	4.4353	15.4989	1.80507	0.00025	0.0665561
Lrrc32	0.448948	1.57044	1.80655	0.03865	0.860391
Ikzf2	0.774678	2.73467	1.8197	0.006	0.334347
Zc3h12a	3.48899	12.3496	1.82358	0.0042	0.279536
Clca5	2.41302	8.56354	1.82737	0.00365	0.254622
Rps27	342.316	1220.75	1.83436	0.04005	0.876598
Igfbp2	0.950031	3.39239	1.83625	0.04515	0.942371
Tuba8	5.70745	20.4059	1.83807	0.00615	0.335677
30005M16	0.708399	2.53415	1.83887	0.04025	0.87945
Il3ra	1.10977	4.0357	1.86255	0.0319	0.772051
Psmb8	2.69328	9.81081	1.86501	0.02735	0.710719
Krt1	82.8596	303.441	1.87267	5e-05	0.0224914
Ly6g6c	53.2516	195.42	1.87568	5e-05	0.0224914
Serpinb12	1.32743	4.8737	1.87638	0.0305	0.760543
Alox12b	3.92845	14.5054	1.88456	0.00325	0.239158
P2ry4	0.359337	1.32776	1.88558	0.03	0.752212
Rassf10	0.461713	1.70604	1.88558	0.03	0.752212
Fzd10	2.47635	9.18182	1.89057	0.00425	0.280006
Ttc9	1.13165	4.25947	1.91224	0.02425	0.673066
Rarres1	4.2922	16.189	1.91523	0.0075	0.363708
Fam46b	2.53102	9.57432	1.91945	0.00645	0.34343
Krt23	8.10106	30.7107	1.92256	0.00165	0.169482
Cdkn2b	0.854393	3.24985	1.9274	0.03715	0.850214
Rdh1	0.989832	3.76502	1.9274	0.01015	0.421678
Slc1a3	0.354508	1.34844	1.9274	0.0298	0.751724
Chit1	4.88365	19.0701	1.96528	0.0034	0.243698
Krt71	5.56156	21.7421	1.96693	0.00105	0.135616
Hmgcs2	0.475683	1.87175	1.97631	0.0258	0.689674
Sprr1a	10.3519	41.4082	2.00002	0.00475	0.297903
Rdh9	1.48403	6.00935	2.01769	0.00835	0.380859
Cnfn	3.97334	16.3177	2.03802	0.01355	0.484273
Mfsd2a	5.52603	22.974	2.05569	0.0009	0.13045
Slco2b1	0.697479	2.93941	2.0753	0.00595	0.334347
Mt4	4.4256	18.9379	2.09733	0.0422	0.900574
D7Ertd443	0.301488	1.29209	2.09953	0.0415	0.894822
Gldc	0.523595	2.24536	2.10042	0.01635	0.538887
Mgll	4.46487	19.2197	2.10589	5e-05	0.0224914
Glul	5.40809	23.7231	2.1331	0.0002	0.0606744
Rec8	0.328884	1.48926	2.17894	0.0465	0.955264
H2-Ab1	1.13069	5.13861	2.18418	0.0185	0.587184
Col23a1	0.250448	1.13912	2.18534	0.0129	0.468748
Nat8l	0.27227	1.2445	2.19246	0.0126	0.463006
Elovl4	16.2032	74.6118	2.20313	5e-05	0.0224914
Gata6	0.542471	2.50555	2.20751	0.0134	0.480228
Cyp2f2	0.314028	1.46749	2.22438	0.0468	0.958951
Fcgbp	10.2783	48.1	2.22644	5e-05	0.0224914
Il18r1	0.267218	1.28915	2.27033	0.0325	0.777913
Lce1a1	2.63279	12.7655	2.27759	0.01075	0.427542
H2-Q7	2.02361	9.85795	2.28436	0.0066	0.345771
Gpr111	0.296308	1.44908	2.28997	0.03005	0.752212
Liph	0.591712	2.90623	2.29618	0.0106	0.426781
Maob	0.206707	1.02337	2.30767	0.04375	0.920514
Il6ra	1.5985	7.96658	2.31724	0.00115	0.140203
Fam57b	0.464178	2.32542	2.32474	0.0386	0.860391
Ces4a	0.637017	3.21421	2.33506	0.00875	0.390903
Avpr1a	0.431594	2.18887	2.34244	0.01395	0.493165
H2-Q6	1.17842	5.99486	2.34688	0.01975	0.606209
H2-Eb1	0.796919	4.06676	2.35137	0.01185	0.451998
Panx3	0.262961	1.35745	2.36798	0.02945	0.745971
Tmem229a	0.233118	1.20915	2.37486	0.0121	0.45752
Cyp2g1	3.32346	17.3903	2.38753	0.0014	0.156094
Slc5a9	0.414508	2.17288	2.39014	0.00815	0.378351
Per1	18.6466	97.863	2.39185	5e-05	0.0224914
Wnt3	1.67164	8.81852	2.39927	0.00145	0.158952
Krt27	1.25509	6.65467	2.40657	0.0086	0.386852
Dtx4	0.236619	1.28575	2.44198	0.00715	0.358737
Cxcl1	0.819857	4.45499	2.44198	0.02655	0.699591
Cldn23	1.04755	5.79267	2.46721	0.0066	0.345771
Skint2	0.516548	2.88169	2.47994	0.02285	0.659433
Kctd14	0.288831	1.64301	2.50805	0.0156	0.52449
Lce1b	1.96071	11.1556	2.50832	0.0188	0.589534
Ly6a	0.676771	3.89736	2.52576	0.0091	0.401891
Krt6b	0.299381	1.73525	2.53509	0.0225	0.655162
Mst1	0.243601	1.42959	2.55301	0.0265	0.699591
Aadacl3	0.378141	2.22288	2.55543	0.0083	0.380859
Scd3	0.915551	5.43031	2.56832	0.00175	0.173933
Pglyrp4	1.93132	11.5715	2.58291	0.00085	0.127451
Hamp2	2.43281	14.6616	2.59135	0.022	0.647833
Pparg	0.276283	1.66842	2.59426	0.02405	0.671804
Clca2	7.43274	45.1935	2.60415	5e-05	0.0224914
Serpina3n	0.188782	1.17236	2.63462	0.04985	0.998383
Acoxl	0.267122	1.7418	2.70501	0.0142	0.499296
Gramd1b	0.174818	1.13993	2.70501	0.02265	0.656589
Serpina3b	2.28364	15.2158	2.73616	0.00065	0.103405
Angptl4	0.866083	5.8746	2.76191	0.0038	0.263676
Klk6	0.341059	2.32984	2.77214	0.01375	0.488743
Fa2h	3.65688	26.3501	2.84912	0.00015	0.0489188
Serpina3j	2.31765	16.8634	2.86316	0.00045	0.0876157
Cidea	1.32385	9.66823	2.86851	0.00665	0.346997
Tsc22d3	13.8414	102.186	2.88413	5e-05	0.0224914
Ptk6	0.389762	3.01802	2.95294	0.0106	0.426781
Cd74	0.897759	6.97469	2.95773	0.00385	0.265731
Ppp2r2c	0.344256	3.00741	3.12697	0.0026	0.20808
Ces1d	0.460714	4.16199	3.17533	0.00785	0.376483
Mmp28	0.122793	1.12106	3.19056	0.0254	0.684593
Pnpla5	0.340657	3.18386	3.22438	0.01135	0.441972
Rptn	0.141393	1.32708	3.23047	0.00975	0.41565
Gpd1	0.235714	2.43359	3.36798	0.0071	0.358737
Akr1c18	0.787719	8.21827	3.38308	0.00595	0.334347
Elovl3	0.393821	4.11532	3.38539	0.00795	0.376751
Areg	0.357585	3.7751	3.40016	0.025	0.680727
Hsd3b6	0.158787	1.69114	3.41283	0.0389	0.86412
Slc6a4	0.179432	1.97168	3.45792	0.0084	0.38142
Gm13178	0.298079	3.50939	3.55745	0.0266	0.699591
H2-Q9	0.229826	2.91104	3.66292	0.0231	0.662285
Chi3l1	0.581072	7.91223	3.76729	0.00305	0.232674
Cyp1a1	0.0839056	1.16271	3.79258	0.02225	0.65225
30403K07	0.619117	11.4778	4.21249	0.00225	0.199668
