# Supplementary material for: Hair follicle stem cells regulate retinoid metabolism to maintain the self-renewal niche for melanocyte stem cells
Source: eLife journal article supplement (doi:10.7554/elife.52712), 2020-01-03
Supplement: supp [file elife-52712-supp-v1.zip › elife_poa_e52712_Supplementary_file_2.xlsx]

## Sheet: Table 1
table S2: related to Figure 2,3,5,6,7 and Figure 5-figure supplement 1
name	Sequence
Krt6a targeting sgRNA	TGCTCAGAGCCCCGAGTTCA
Krt6 KI 5' genotyping-F	CATCATTGGAGAGAGGGGTCG
Krt6 KI 5' genotyping-R	TCACATTGCCAAAAGACGGCA
Krt6 KI 3' genotyping-F	AACGAGTGATGAGGTTCGCAAG
Krt6 KI 3' genotyping-R	CCCAGGTAGCCTTGTCTCTACTT
Krt6 KI Ctrl genotyping-F	AGTGTTAGTTGTTTGAGTCACATAAAATTG
Krt6 KI Ctrl genotyping-R	GTCATCCTGGTTTCGAAGGATATAAGGG
Nfatc1-qPCR-F	CCATACGAGCTTCGGATCGA
Nfatc1-qPCR-R	AGTAACCGTGTAGCTGCACAATG
Sox9-qPCR-F	GACAAGCGGAGGCCGAA
Sox9-qPCR-R	CCAGCTTGCACGTCGGT
SHH-qPCR-F	AAAGCTGACCCCTTTAGCCTA
SHH-qPCR-R	TTCGGAGTTTCTTGTGATCTTCC
Hoxc13-qPCR-F	CGCGCTCATCCCTGTTGAA
Hoxc13-qPCR-R	CGGCGCTTCTCTTTGGTGAT
Axin2-qPCR-F	TAGGTTCCGGCTATGTCTTTG
Axin2-qPCR-R	TGTTTCTTACTCCCCATGCG
Lef1-qPCR-F	AGCCTGTTTATCCCATCACG
Lef1-qPCR-R	TGTTACAATAGCTGGATGAGGG
Hes1-qPCR1-F	ATAGCTCCCGGCATTCCAAG
Hes1-qPCR1-R	TATTTCCCCAACACGCTCGG
Hey1-qPCR-F	TTGTCTGAGCTGAGAAGGCTG
Hey1-qPCR-R	CCCCAAACTCCGATAGTCCA
CD34-qPCR-F	TGGGTAGCTCTCTGCCTGAT
CD34-qPCR-R	GCTGGTGTGGTCTTACTGCT
Lgr5-qPCR-F	CCAATGGAATAAAGACGACGGCAACA
Lgr5-qPCR-R	GGGCCTTCAGGTCTTCCTCAAAGTCA
Bmp6-qPCR-F	TTCCGCGTCTACAAGGACTG
Bmp6-qPCR-R	CATCCCGAGTCACCACACTC
FGF18-qPCR-F	CCTGCACTTGCCTGTGTTTAC
FGF18-qPCR-R	TGCTTCCGACTCACATCATCT
ADH1-qPCR-F	TGTTGAGAGCGTTGGAGAAG
ADH1-qPCR-R	CGCTTCGGCTACAAAAGTTG
RDH1-qPCR-F	TCCATGAAGCCTGAGAAAGC
RDH1-qPCR-R	GTGTTGACTAAGAACCCCAGAC
ADH7-qPCR-F	GGTTGTGGAGAGTGTTGGAG
ADH7-qPCR-R	CCTGTCAGATCGCTCCTAATG
RBP2-qPCR-F	TTCCTTCACAGTCACCGAAC
RBP2-qPCR-R	CCATTTCCCAGGTTCCATTTTG
Cdkn1a-qPCR-F	CAGATCCACAGCGATATCCAG
Cdkn1a-qPCR-R	TCAAAGTTCCACCGTTCTCG
Chat-qPCR-F	ATTGGGTCTCTGAATACTGGC
Chat-qPCR-R	TGGGAATGGATTGGCTGTC
Crabp1-qPCR-F	ACCACGGAGATCAACTTCAAG
Crabp1-qPCR-R	GCGCCAAATGTCAGGATTAG
Crabp2-qPCR-F	TTGGTGAAATGGGAGAGTGG
Crabp2-qPCR-R	TTTGTAAGATGGACGTGGGAG
Hbegf-qPCR-F	ACCCATGCCTCAGGAAATAC
Hbegf-qPCR-R	AACATGAGAAGTCCCACGATG
Lefty1-qPCR-F	CAGACTCAAGACCCTTTCAGG
Lefty1-qPCR-R	GACCATCCCTTCCACATCAG
ckit-qPCR-F	TGTGGCTAAAGATGAACCCTC
ckit-qPCR-R	ACACTCCAGAATCGTCAACTC
DCT-qPCR-F	TGGAGTGGCCCTTATATCCT
DCT-qPCR-R	CGGCTTCTTCCGATTACAG
tyrp1-qPCR-F	AGCCCCAACTCTGTCTTTTC
tyrp1-qPCR-R	GGTCTCCCTACATTTCCAGC
SCF-total-qPCR-F	TCAAGAGGTGTAATTGTGGACG
SCF-total-qPCR-R	GGGTAGCAAGAACAGGTAAGG
k14-qPCR-F	TGGAGGTGAAGATTCGGGAC
k14-qPCR-R	TGCTCCGTCTCAAACTTGGTC
PPIB-qPCR-F	AGCAAGTTCCATCGTGTCATC
PPIB-qPCR-R	AGCTTGAAGTTCTCATCTGGG
