# Supplementary figures and images for: Hair follicle stem cells regulate retinoid metabolism to maintain the self-renewal niche for melanocyte stem cells
Source: eLife journal article supplement (doi:10.7554/elife.52712), 2020-01-03

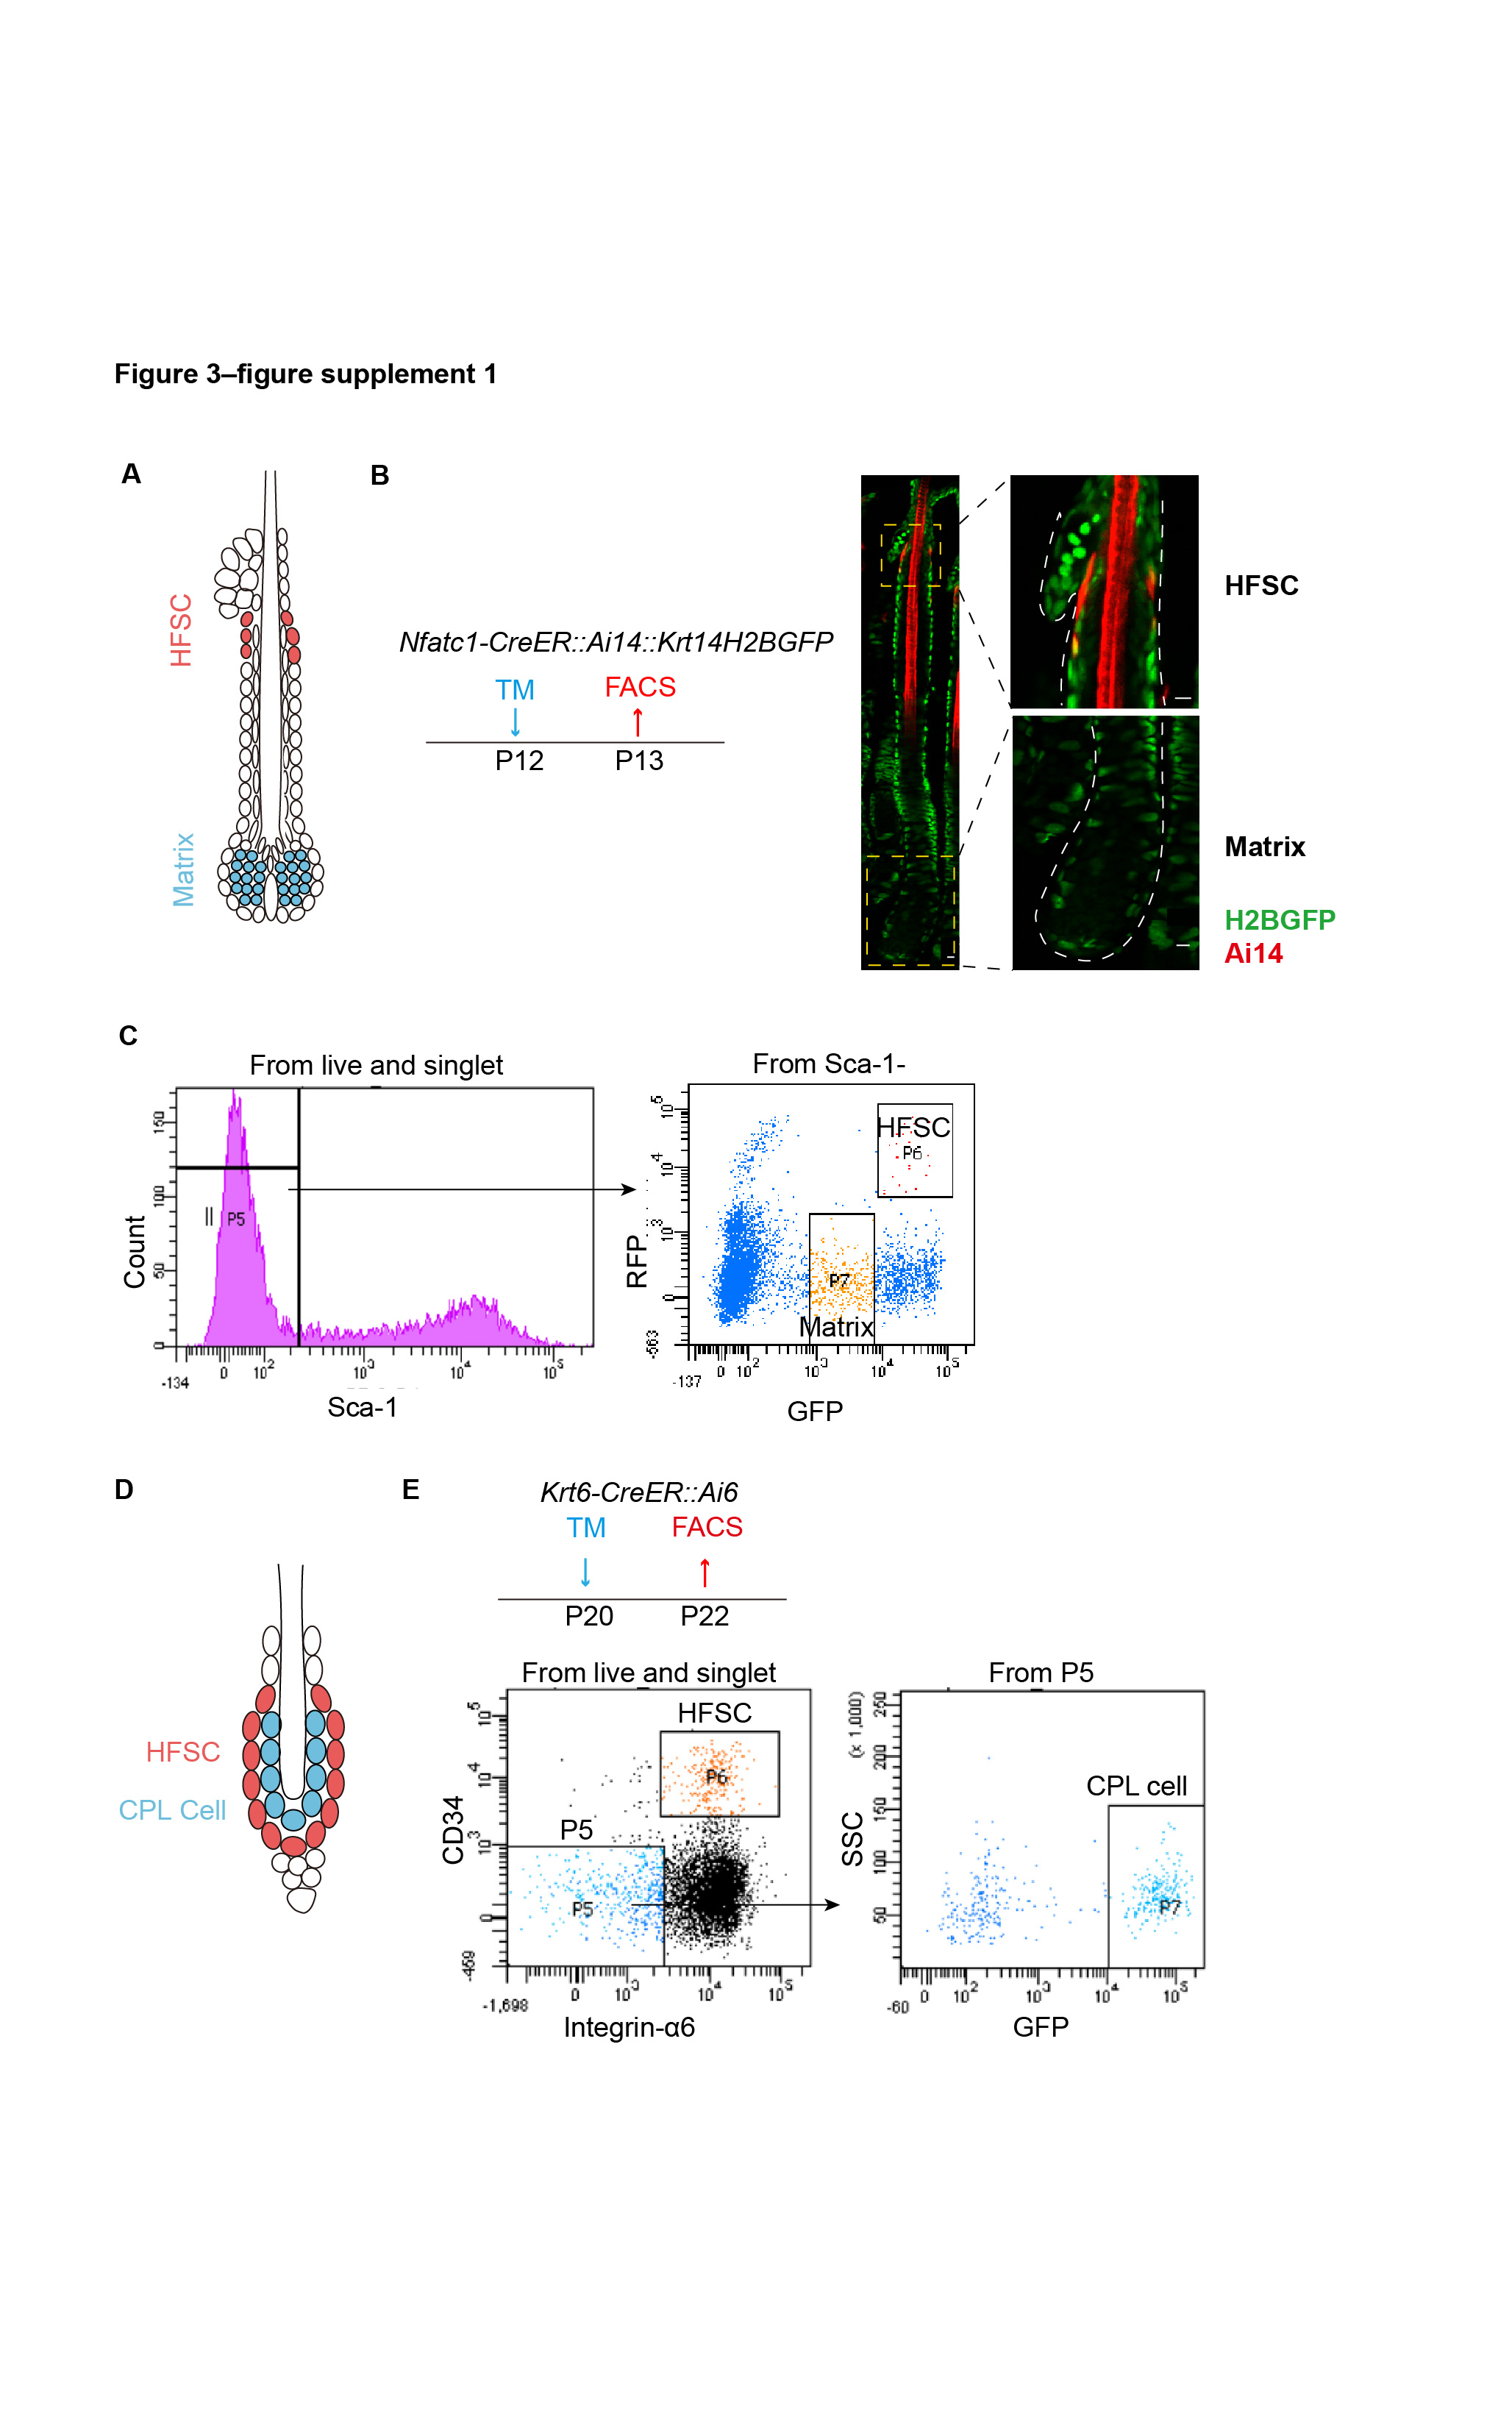

Supplement: supp [file elife-52712-supp-v1.zip › elife_poa_e52712_Figure_3_figure_supplement_1.jpg]

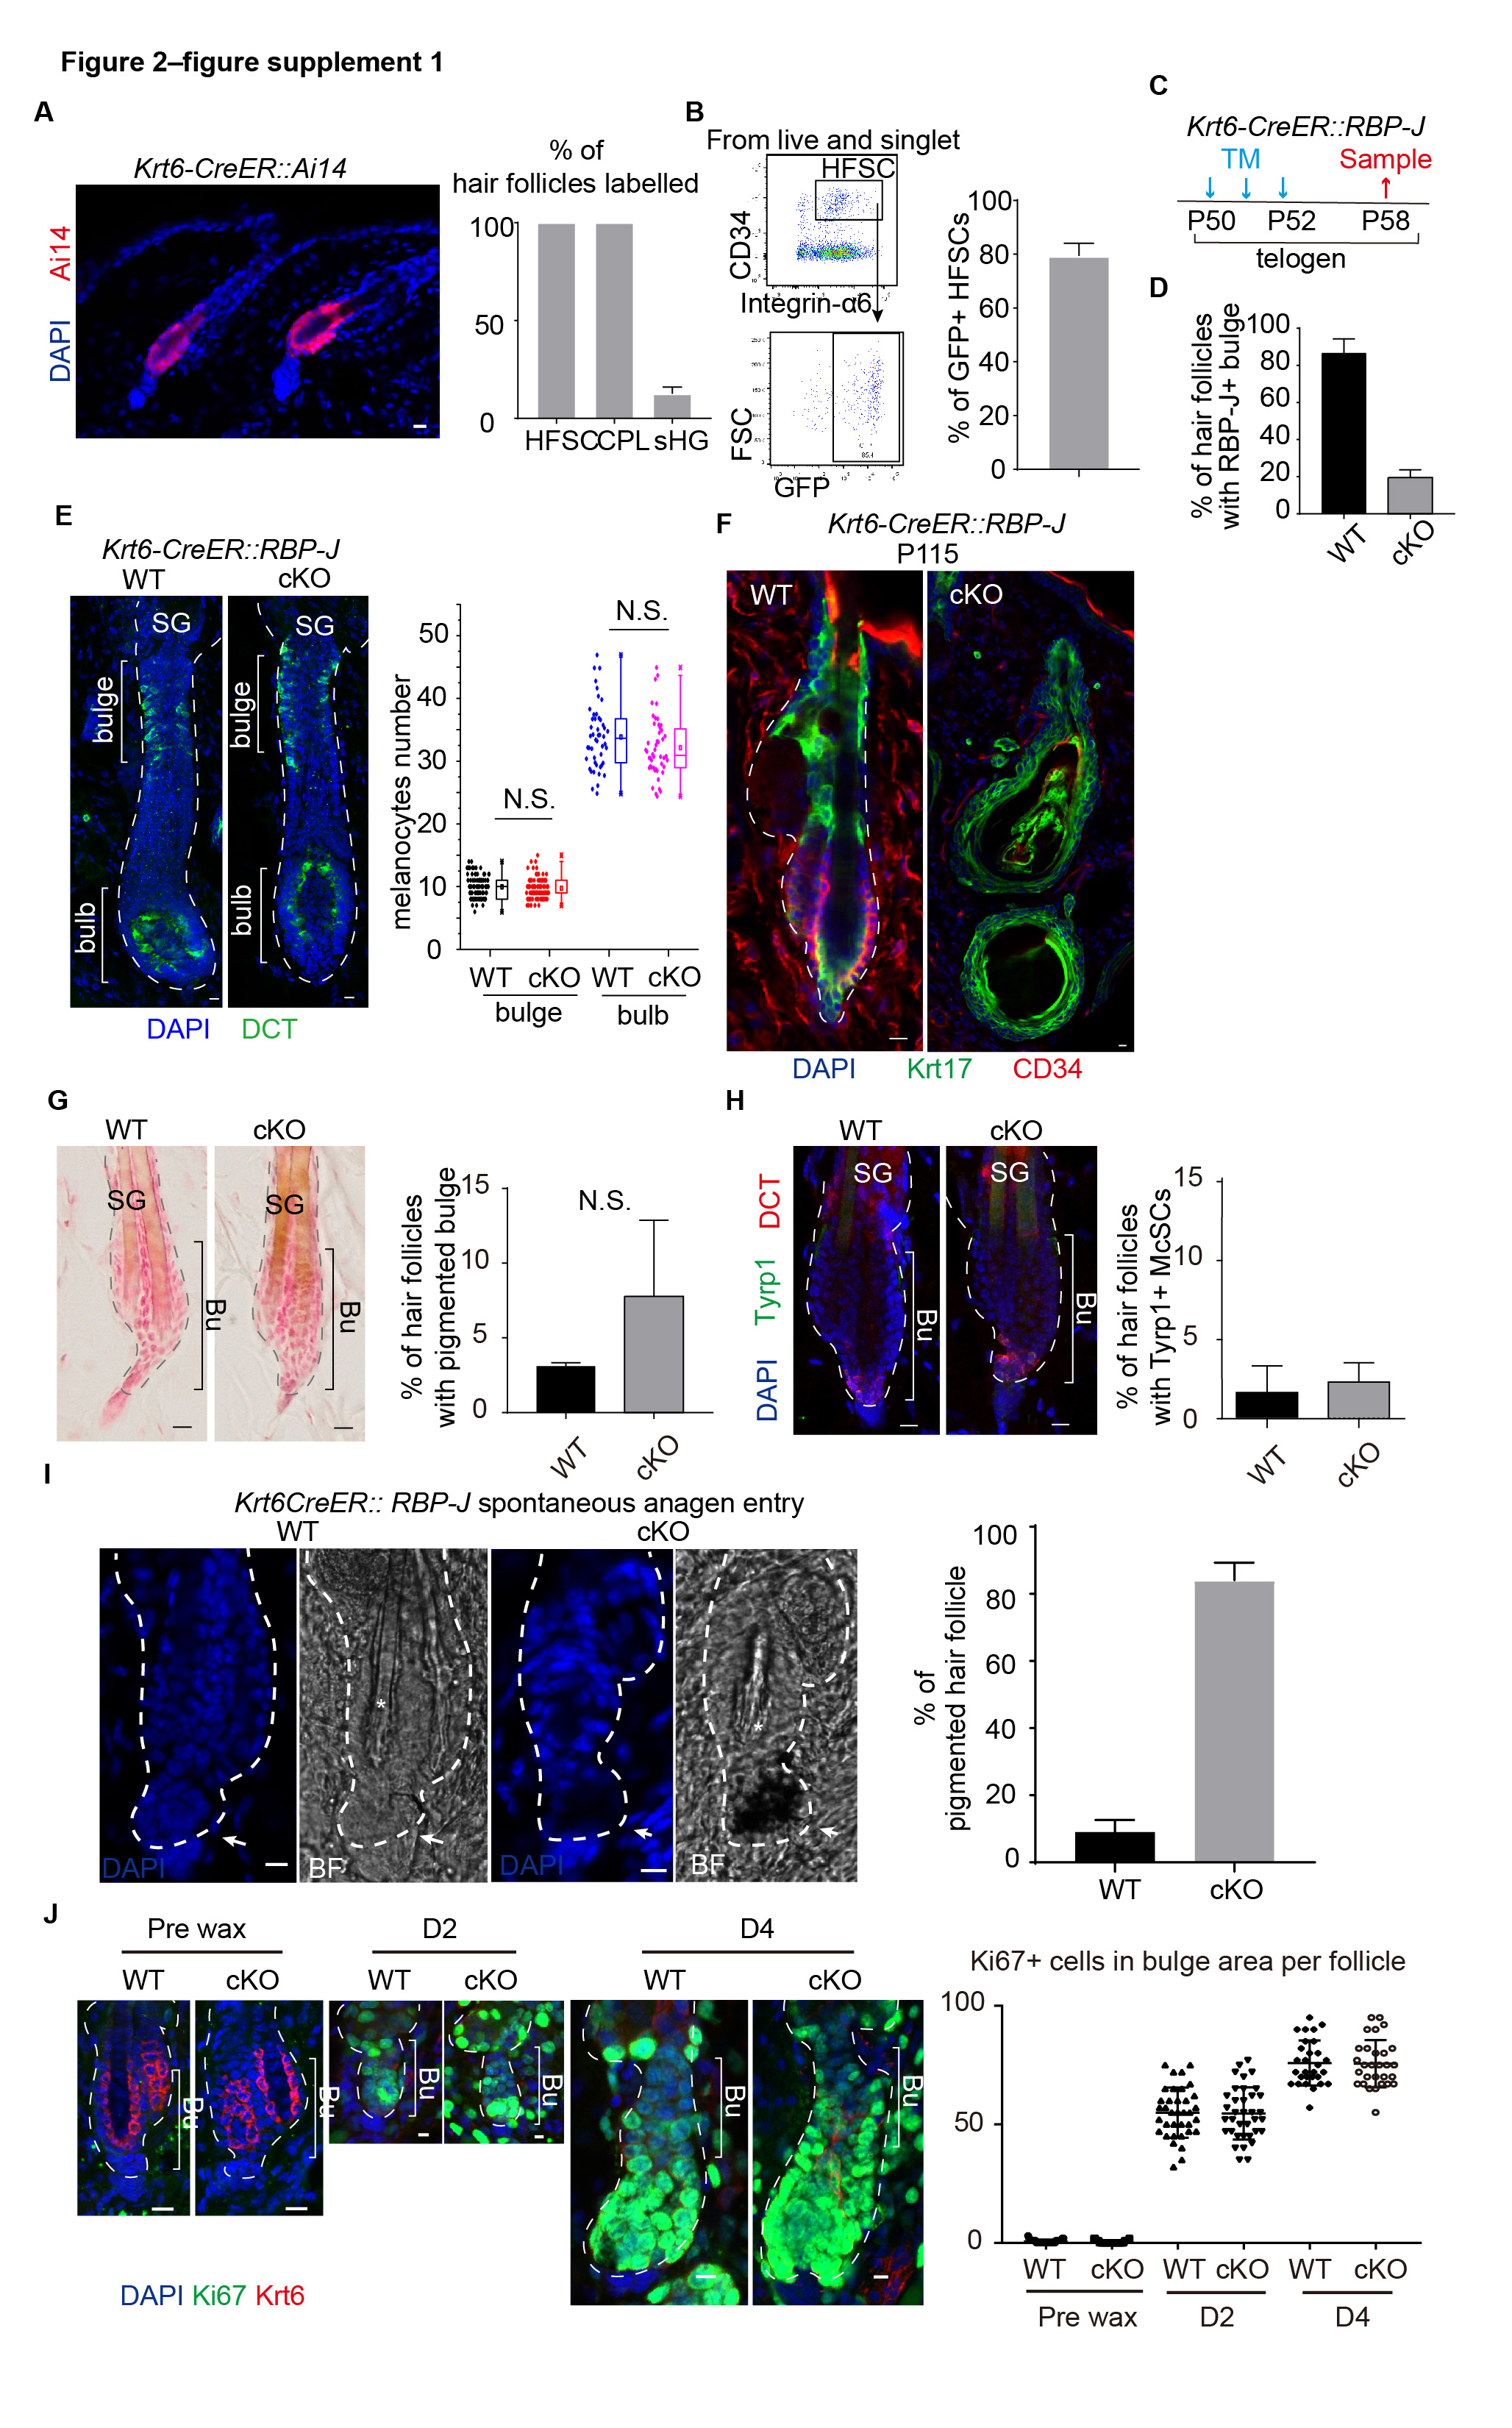

Supplement: supp [file elife-52712-supp-v1.zip › elife_poa_e52712_Figure_2_figure_supplement_1.jpg]

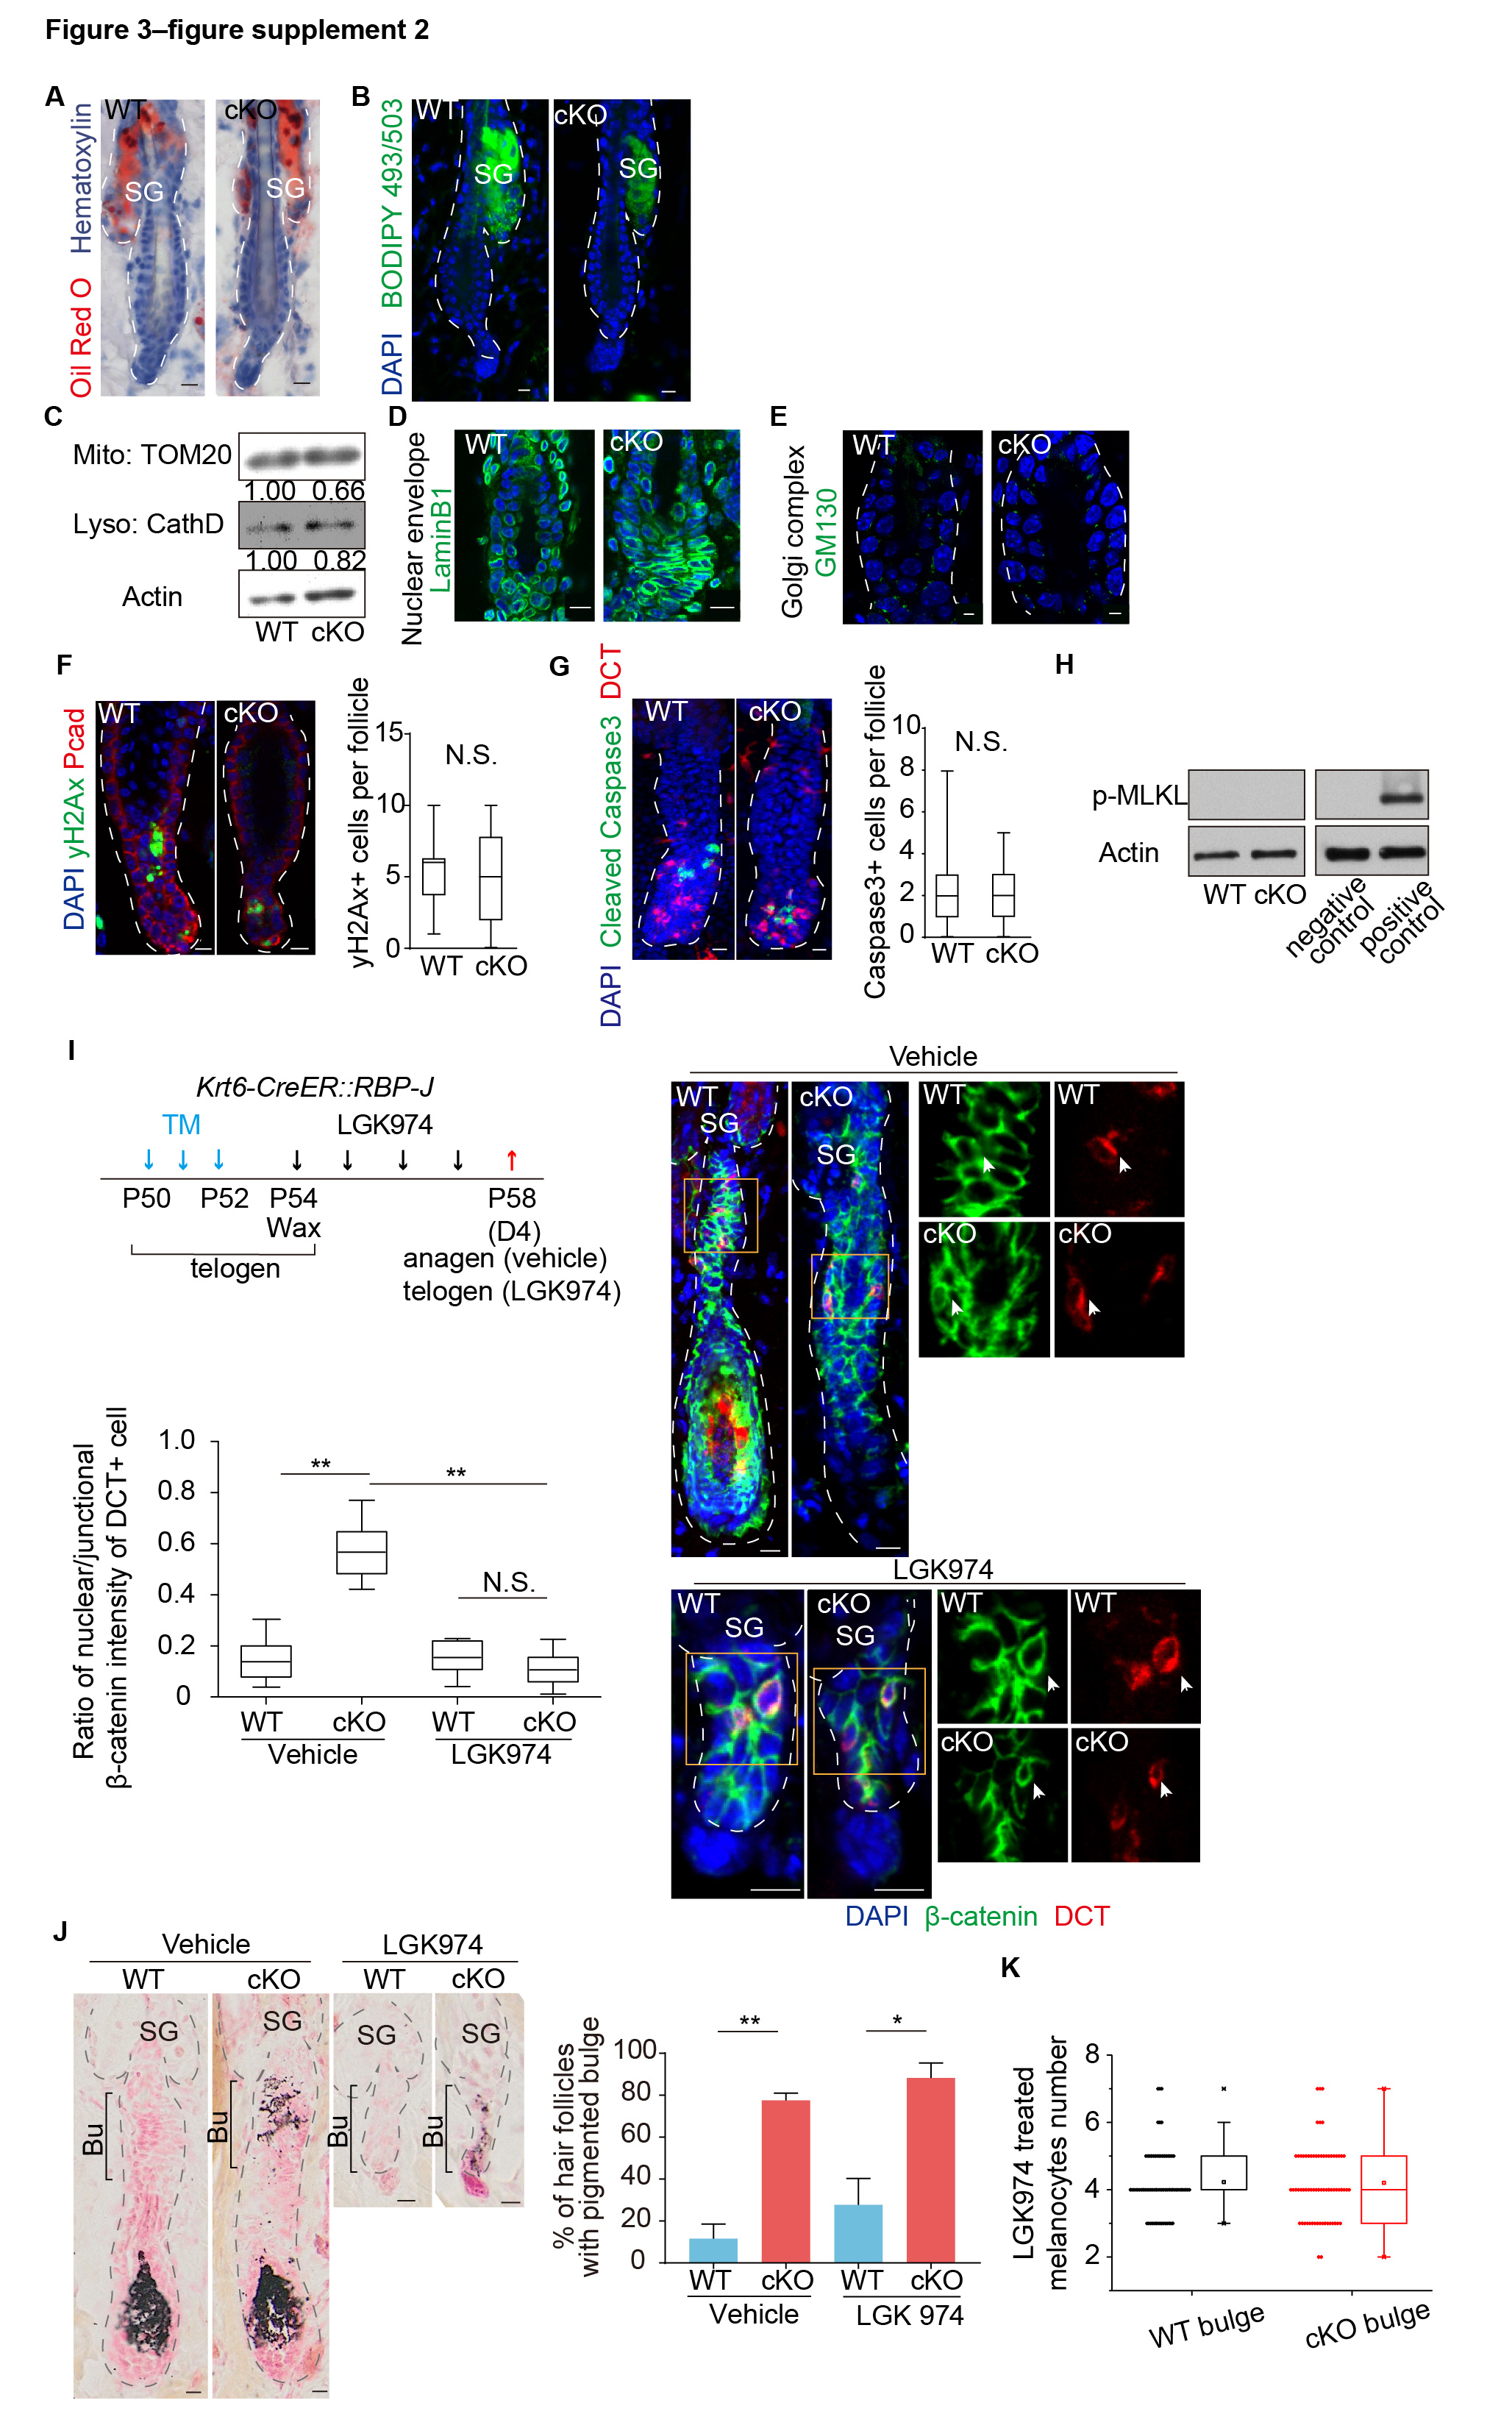

Supplement: supp [file elife-52712-supp-v1.zip › elife_poa_e52712_Figure_3_figure_supplement_2.jpg]

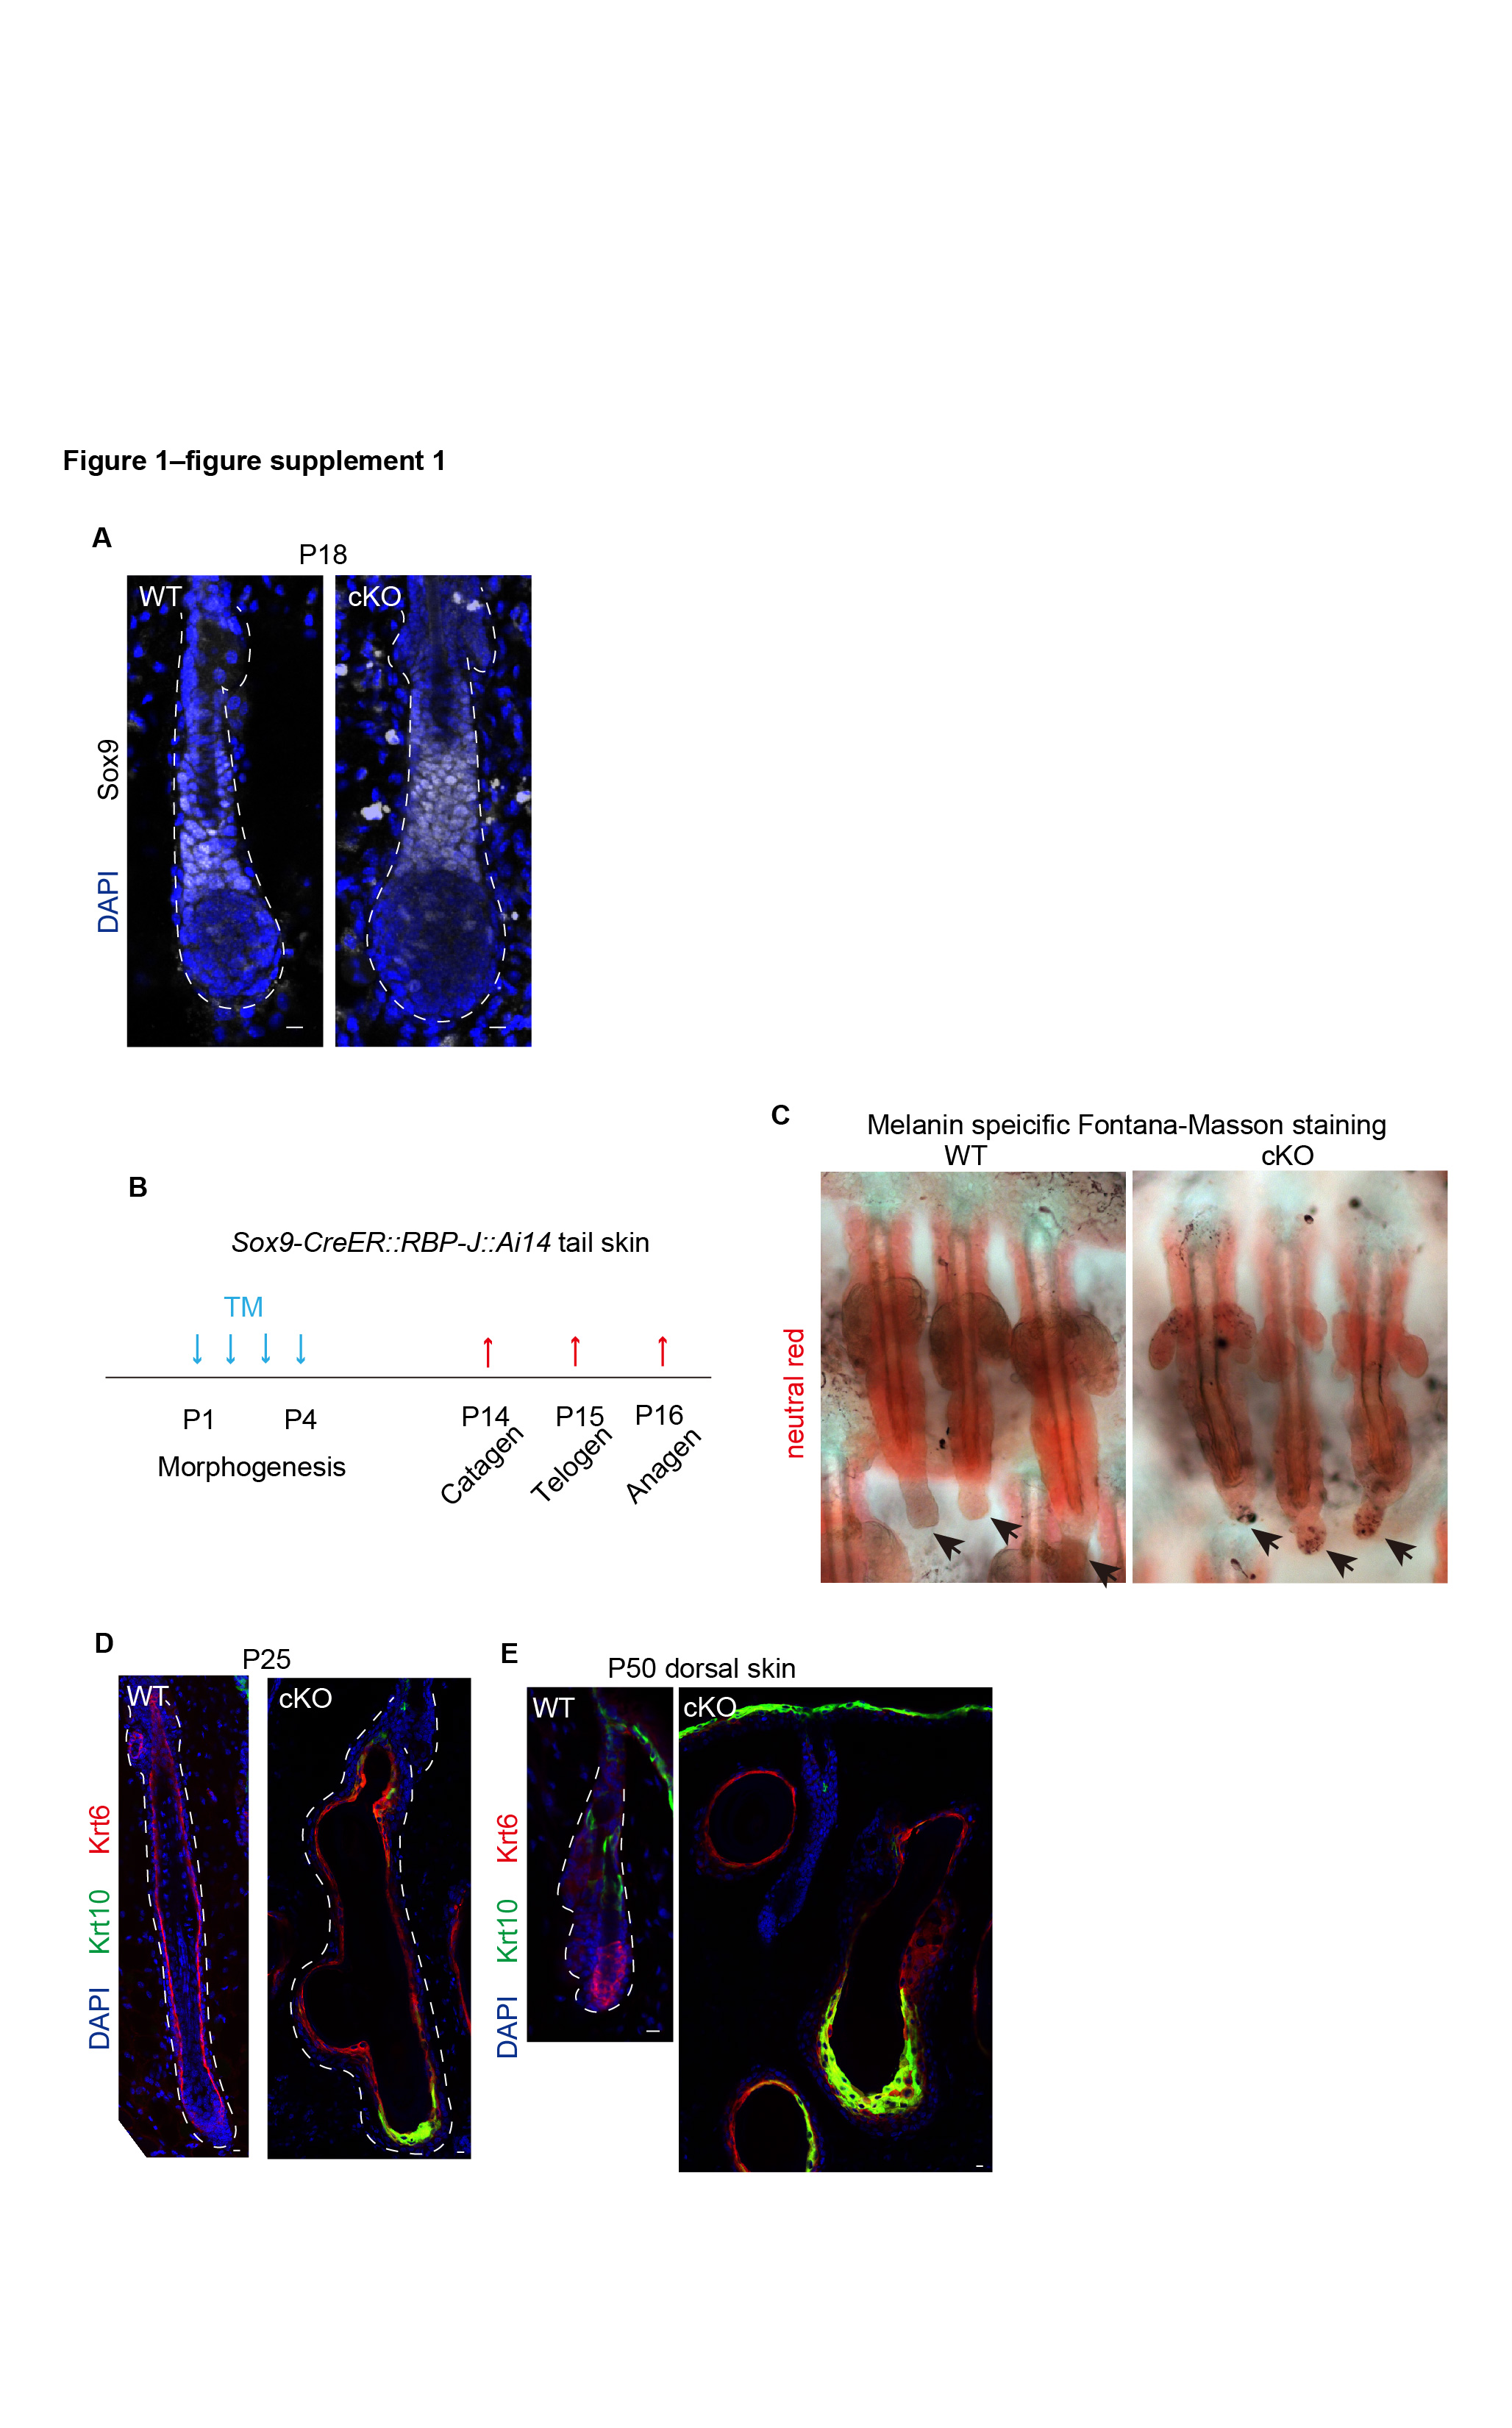

Supplement: supp [file elife-52712-supp-v1.zip › elife_poa_e52712_Figure_1_figure_supplement_1.jpg]

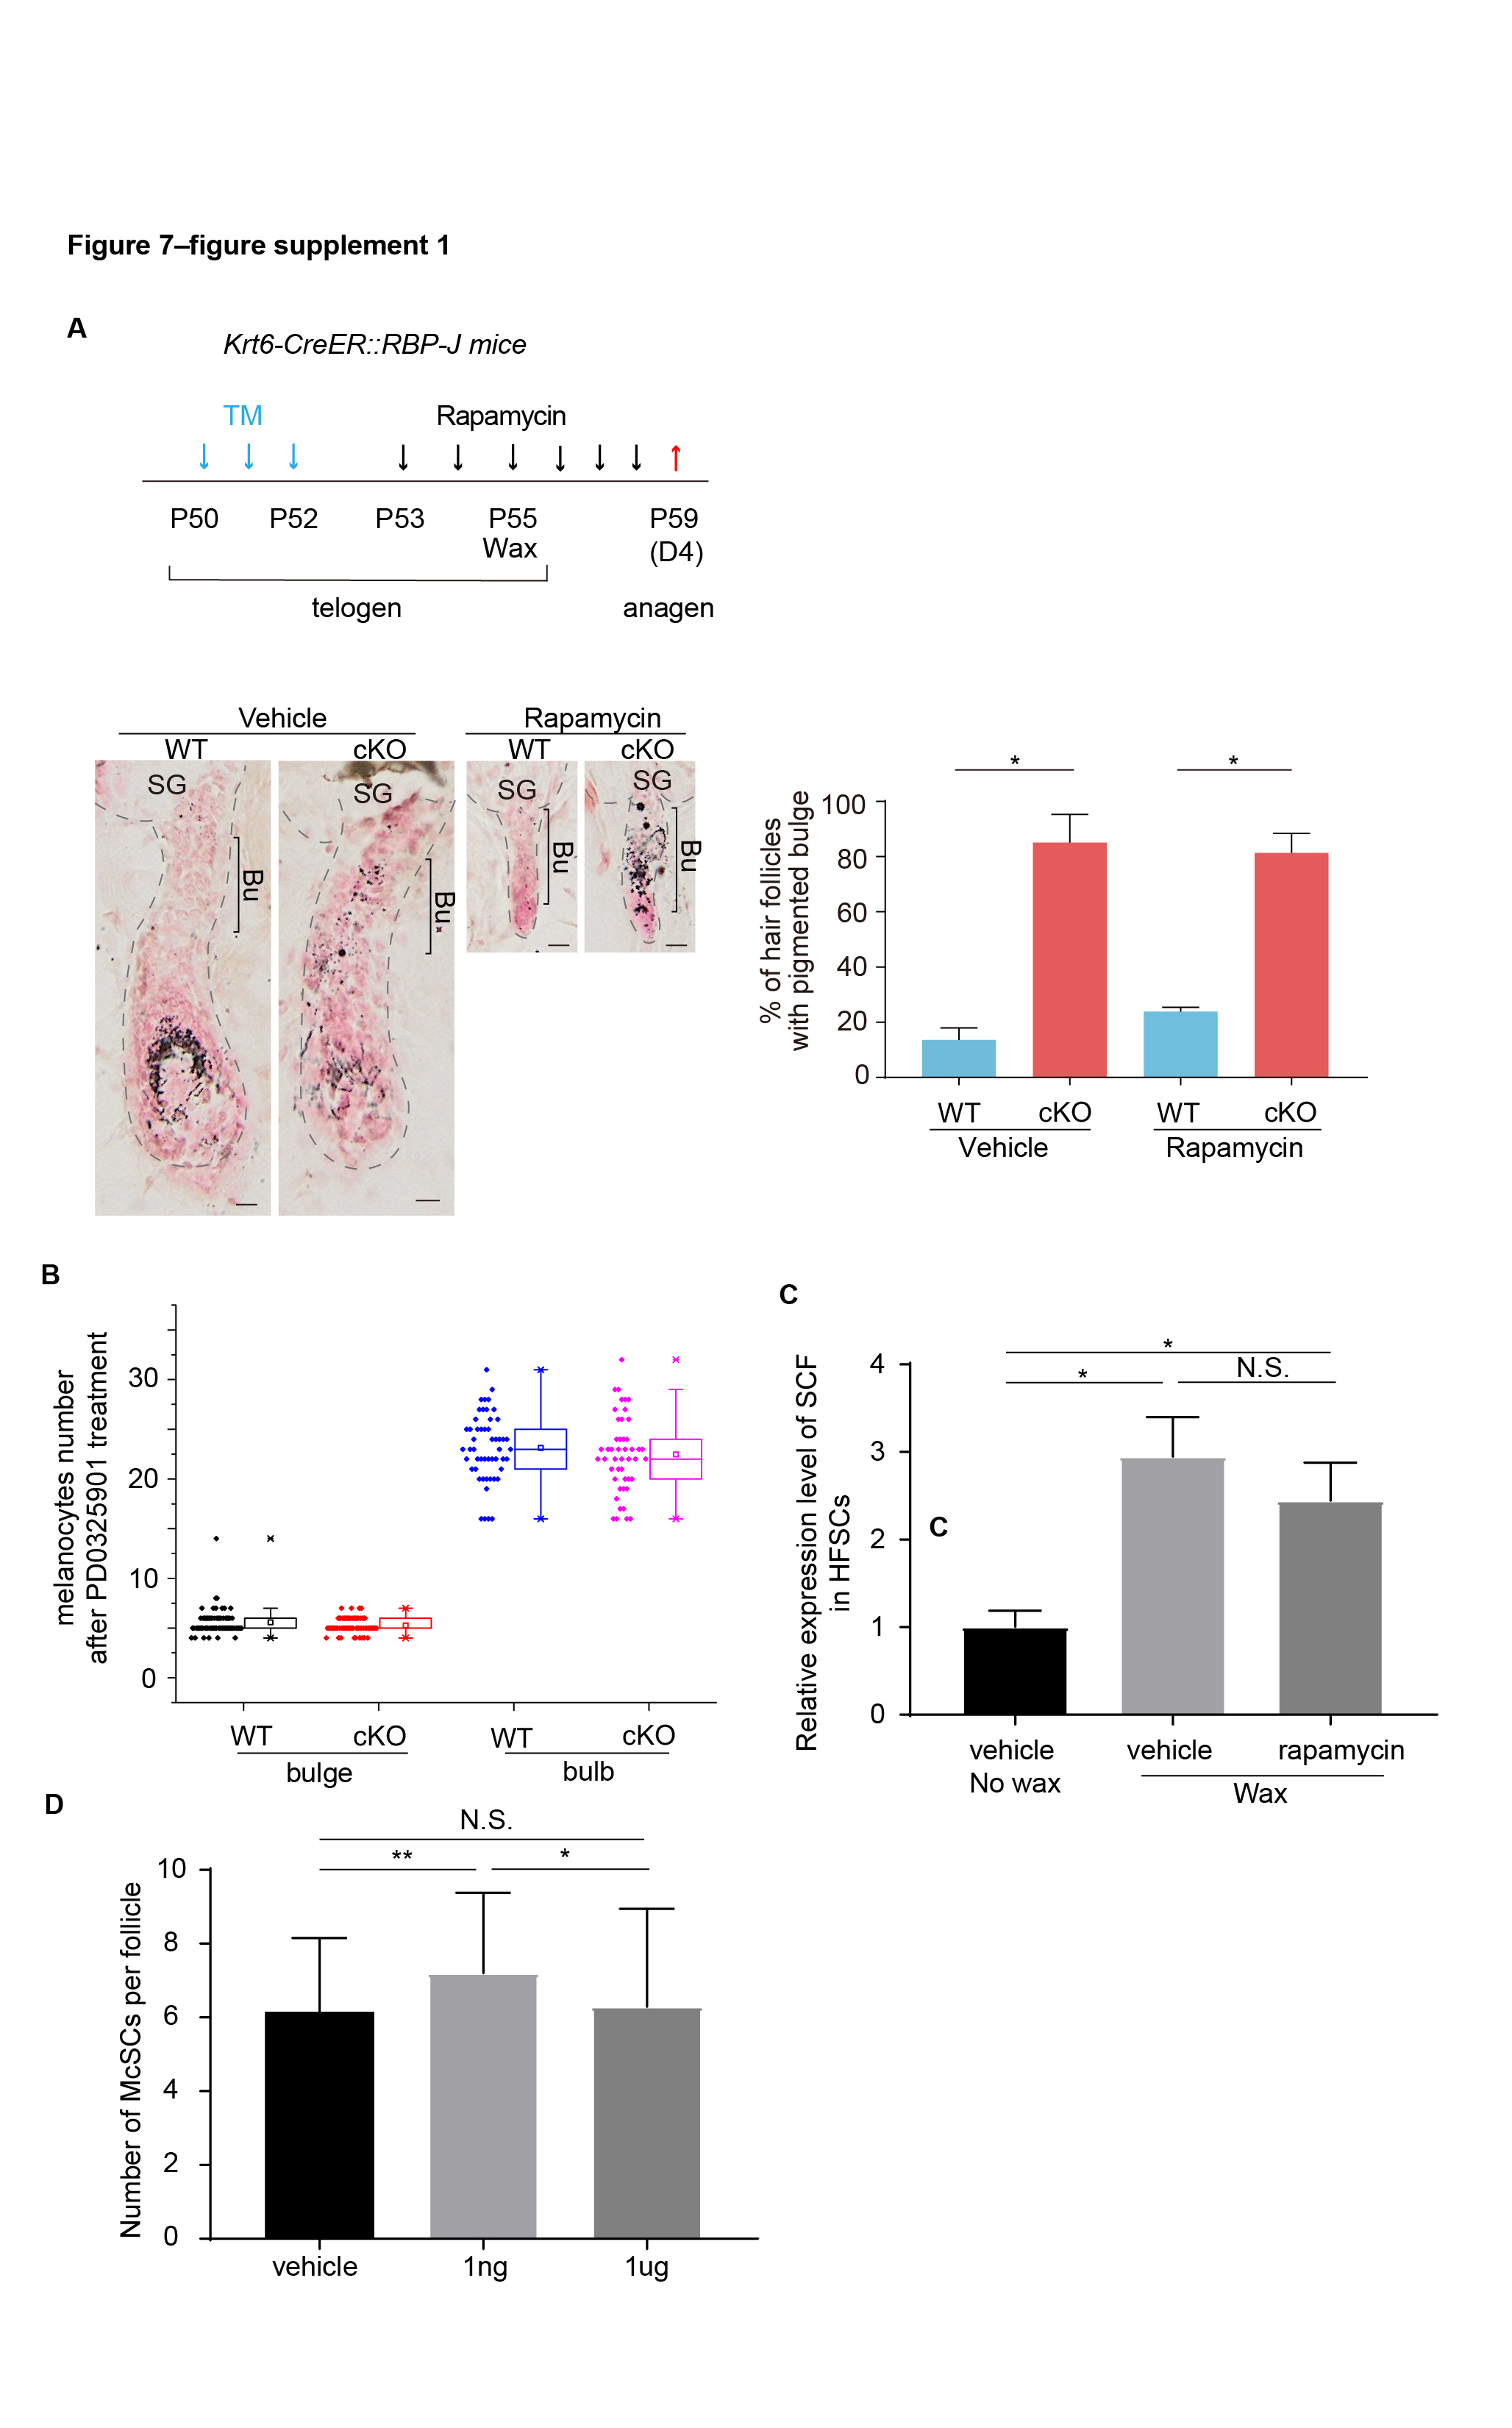

Supplement: supp [file elife-52712-supp-v1.zip › elife_poa_e52712_Figure_7_figure_supplement_1.jpg]

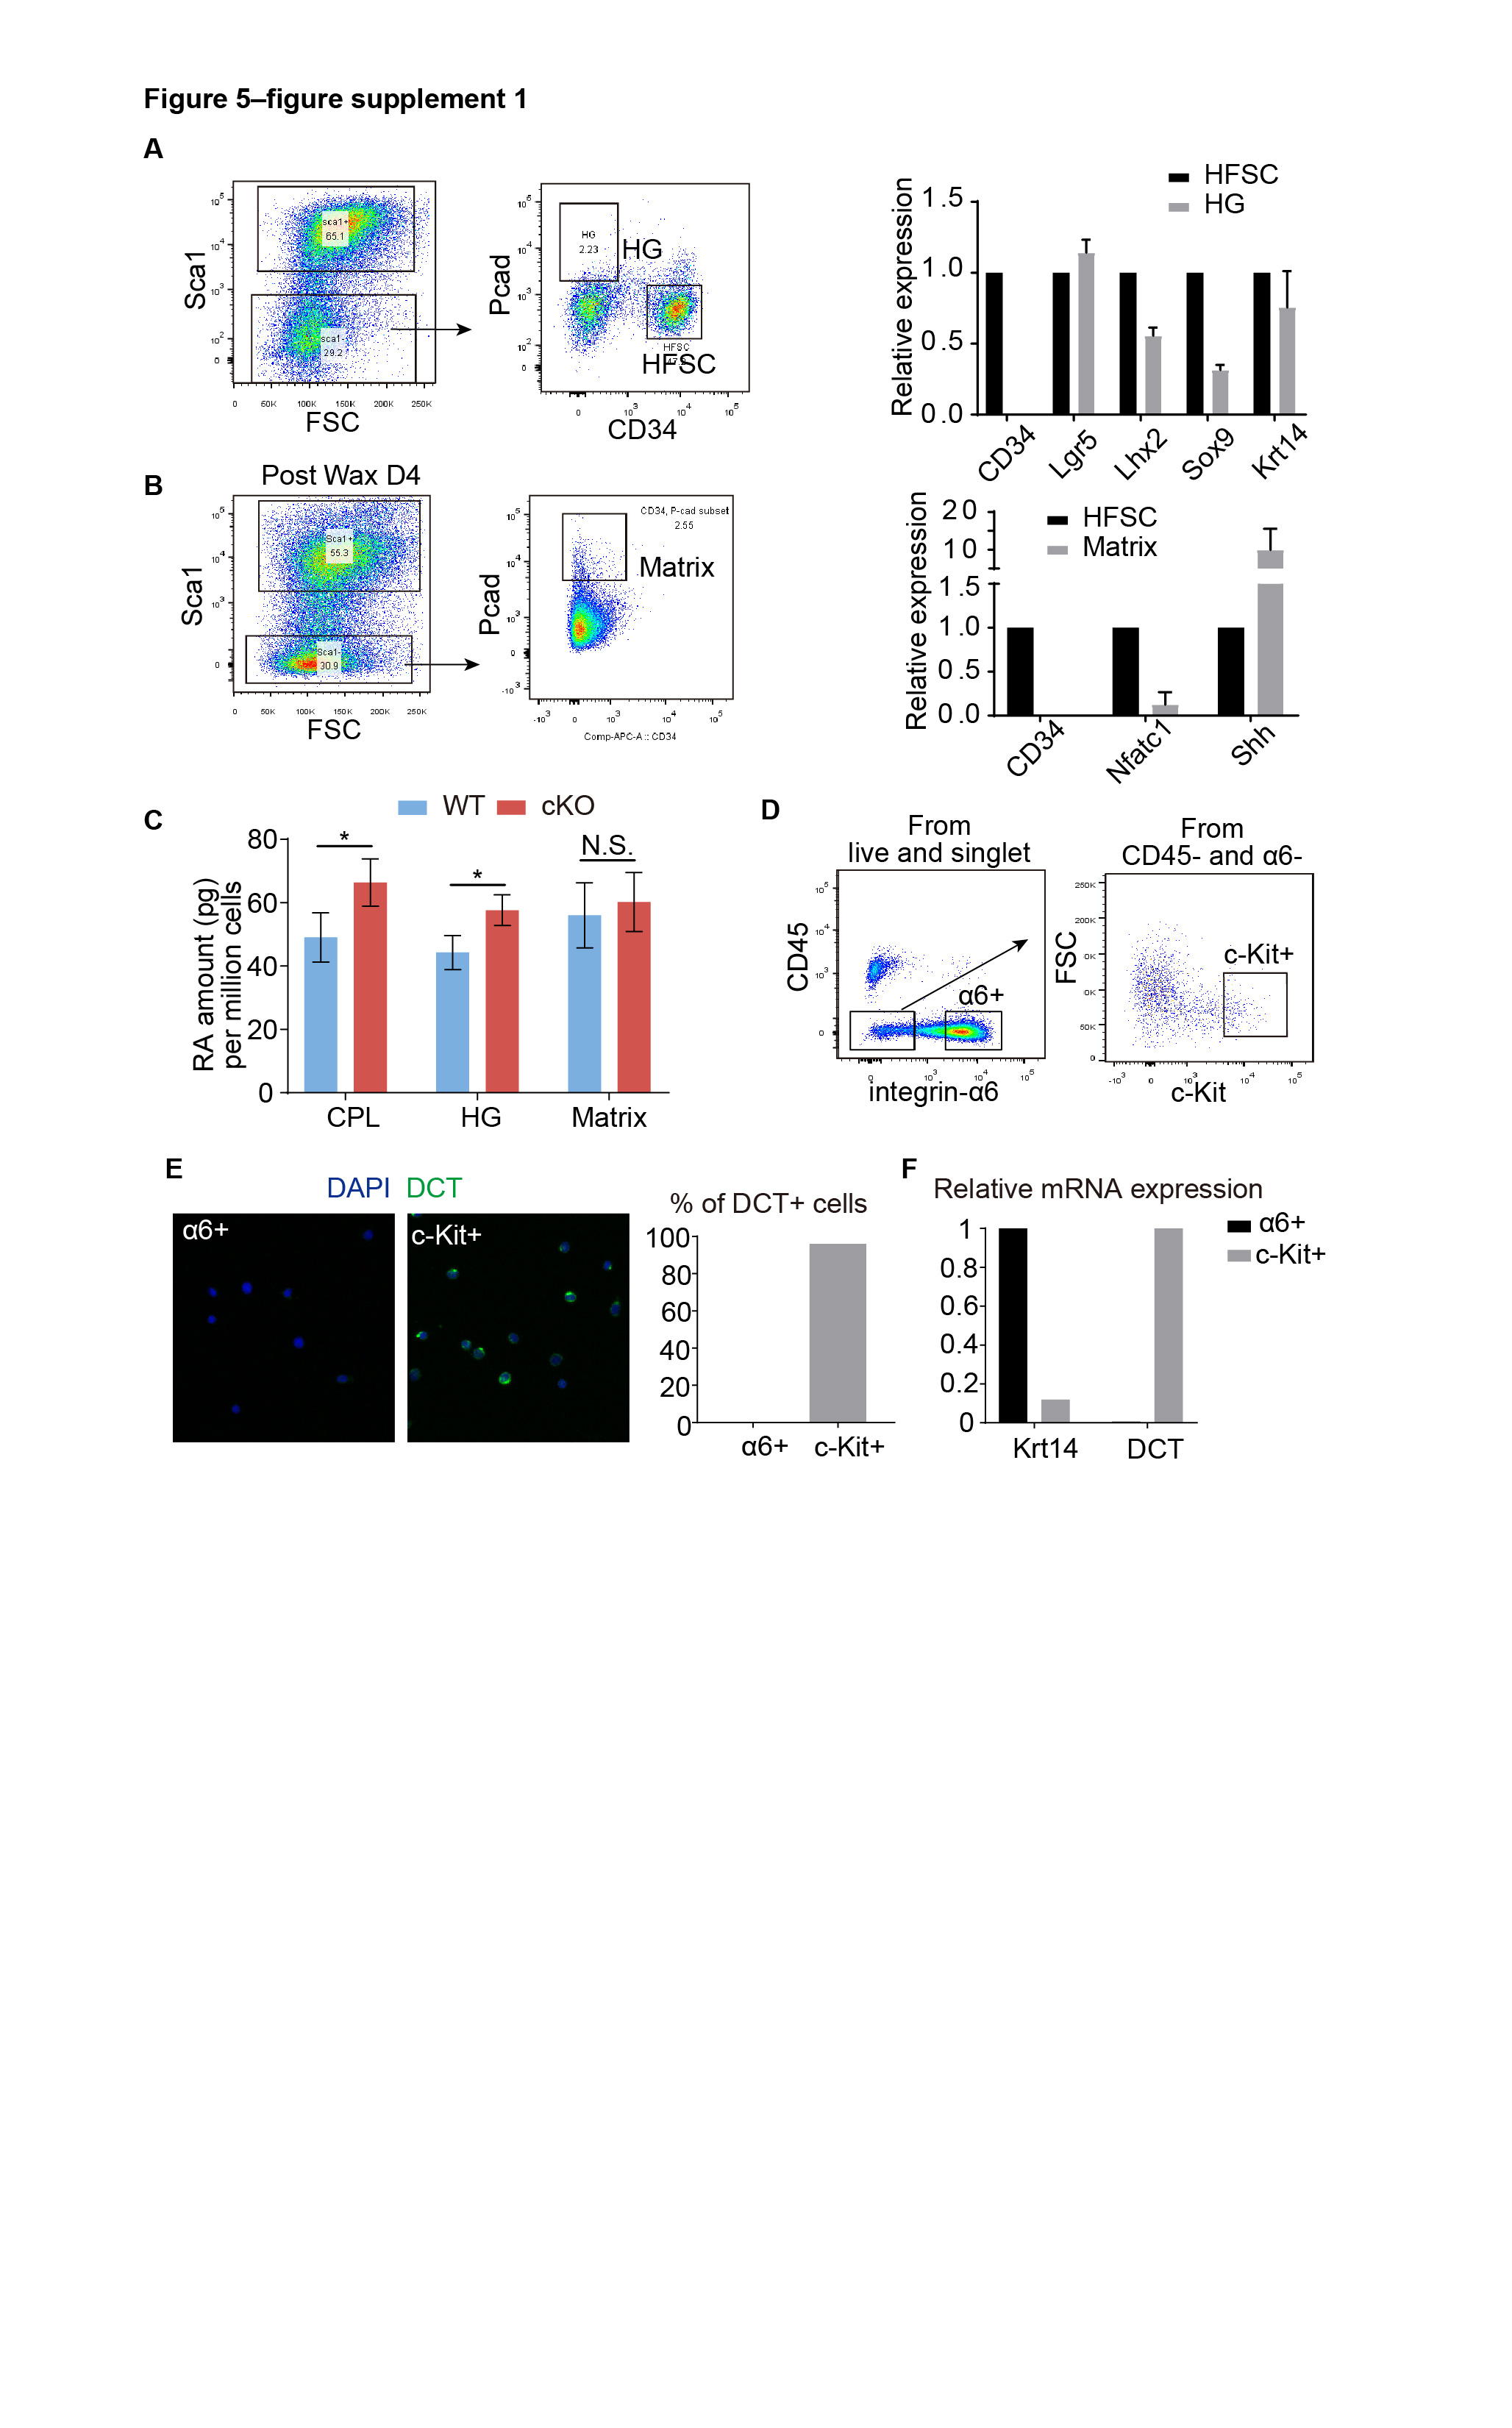

Supplement: supp [file elife-52712-supp-v1.zip › elife_poa_e52712_Figure_5_figure_supplement_1.jpg]

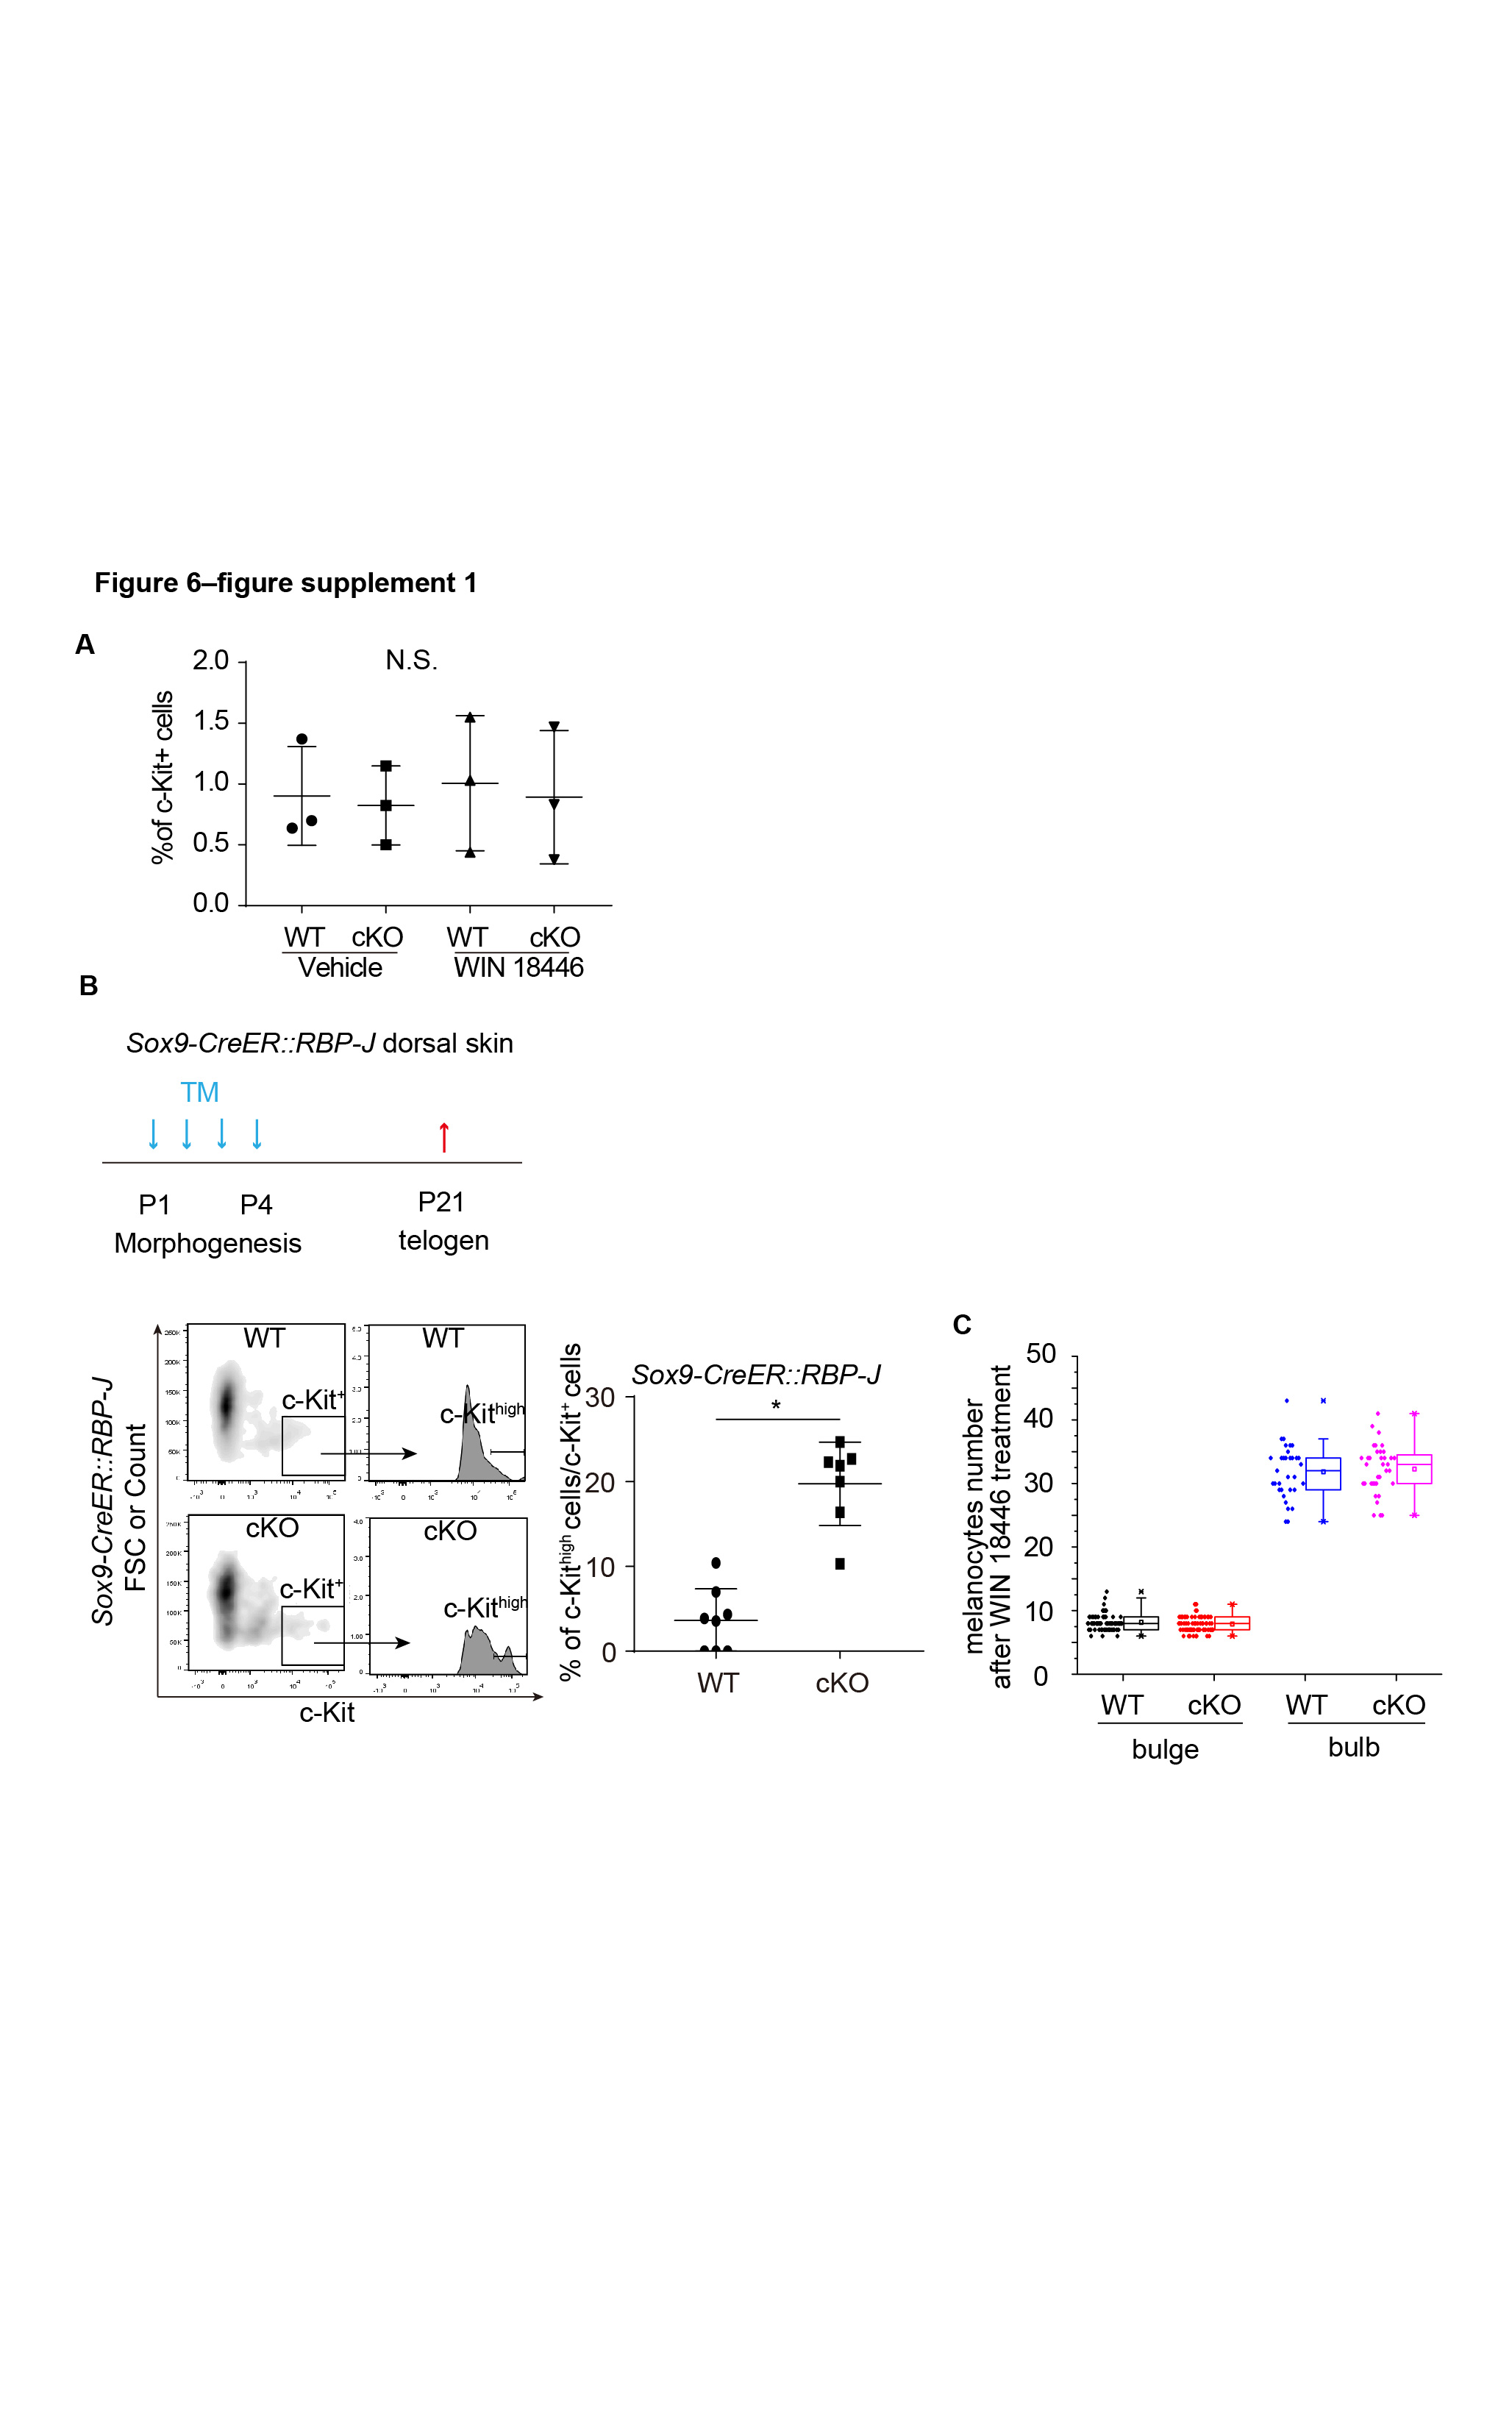

Supplement: supp [file elife-52712-supp-v1.zip › elife_poa_e52712_Figure_6_figure_supplement_1.jpg]
